# Supplementary material for: Precise and accurate Lu–Hf isotope analysis of columbite-group minerals by MC-ICP-MS
Source: Royal Society of Chemistry journal article supplement (doi:10.1039/d1ja00125f), 2021-01-01
Supplement: d1ja00125f1.pdf [file d1ja00125f1.pdf]

1

**Electronic Supplementary Information**

2

3 **Precise and accurate Lu–Hf isotope analysis of columbite-group**  
4 **minerals by MC–ICP–MS**

5 Zhi-Min Tang<sup>a</sup>, Xu-Dong Che<sup>a,\*</sup>, Yue-Heng Yang<sup>b,\*</sup>, Fu-Yuan Wu<sup>b</sup>, Ru-Cheng Wang<sup>a</sup>,

6 Jin-Hui Yang<sup>b</sup>, Axel Gerdes<sup>c</sup>, Ze-Ying Zhu<sup>d</sup>, Feng Liu<sup>a</sup>, Chang Zhang<sup>b</sup>

7 *<sup>a</sup>State Key Laboratory for Mineral Deposits Research, School of Earth Sciences and*  
8 *Engineering, Nanjing University, Nanjing, 210023, China*

9 *<sup>b</sup>State Key Laboratory of Lithospheric Evolution, Institute of Geology and Geophysics,*  
10 *Chinese Academy of Sciences, Beijing, 100029, China*

11 *<sup>c</sup>Institut für Geowissenschaften, Goethe Universität Frankfurt, Altenhoferallee 1, D-*  
12 *60438 Frankfurt am Main, Germany*

13 *<sup>d</sup>Tianjin Center of Geological Survey, CGS, Tianjin, 300170, China*

14

15 □ Corresponding author:

16 [xdche@nju.edu.cn](mailto:xdche@nju.edu.cn) (X.-D. Che), [yangyueheng@mail.iggcas.ac.cn](mailto:yangyueheng@mail.iggcas.ac.cn) (Y.-H. Yang).

17

18 This file includes

19 Method S1 to S2

20 Fig. S1

21 Table S1 to S9.

## 22 **Method S1. Major-element analyses by EPMA**

23 Grains of samples NP-2, U-1, U-3, Coltan139 and 713-79 were extracted, mounted  
24 in epoxy resin and polished. Then their back-scattered electron (BSE) images and  
25 quantitative analyses of samples were acquired with two electron probe microanalyzers  
26 (EPMA) involving JEOL JXA-8100M and JXA-8230 at State Key Laboratory for  
27 Mineral Deposits Research, Nanjing University (NJU), Nanjing, China. The operating  
28 conditions were an accelerating voltage of 15 kV, a beam current of 20 nA and a beam  
29 size of ca. 1  $\mu\text{m}$ . The peak counting times were 20 s for Sn, W and Sc, and 10 s for  
30 others. Pure metals (Ta, Nb, Sc), scheelite (W), synthetic  $\text{Fe}_2\text{O}_3$  (Fe), synthetic  $\text{MnO}_2$   
31 (Mn), sintered  $\text{MnTiO}_3$  (Ti) and  $\text{SnO}_2$  (Sn) were used as standards. Data were corrected  
32 using standard ZAF correction procedures.

## 33 **Method S2. *In situ* trace-element and U-Pb by LA-ICP-MS**

34 The trace elements and *in situ* U-Pb dating of these CGM samples were conducted  
35 using a Geolas Plus 193 nm excimer ArF laser ablation system coupled to an Agilent  
36 7500a quadrupole (Q) ICP-MS at State Key Laboratory of Lithospheric Evolution,  
37 Institute of Geology and Geophysics, Chinese Academy of Sciences (CAS), Beijing,  
38 China, and a RESOLUTION S155 laser ablation system integrated with a Thermo Fisher  
39 Scientific iCAP-Q ICP-MS instrument at NJU. For detailed information on analytical  
40 methods, see Che *et al.*<sup>1</sup>. During analysis of trace elements and *in situ* U-Pb dating of  
41 CGMs at CAS, each group of five unknowns was followed by zircon standards (91500  
42 and GJ-1), CGM reference material (Coltan139) and NIST standard (SRM 610)  
43 measurement. The laser was set to a 5-10  $\text{J}/\text{cm}^2$  fluence, a 44-90  $\mu\text{m}$  spot size and a 3-

44 4 Hz repetition rate. Off-line data analysis was performed using GLITTER 4.0  
45 computer program (GEMOC, Macquarie University). The U-Pb ages were calculated  
46 using the ISOPLOT/EX 3.23 software package. During analysis of CGMs trace element  
47 at NJU, each run included eight sample analyses following by duplicate analysis of  
48 SRM 610, United States Geological Survey standards (BCR-2G and GSE-1G) and  
49 Coltan139. The analyses were performed using a 5.24-5.31 J/cm<sup>2</sup> fluence, a 30-43 μm  
50 diameter beam size and 4 Hz repetition rate. Off-line data analysis was performed using  
51 the ICPMSDataCal program.<sup>2</sup>

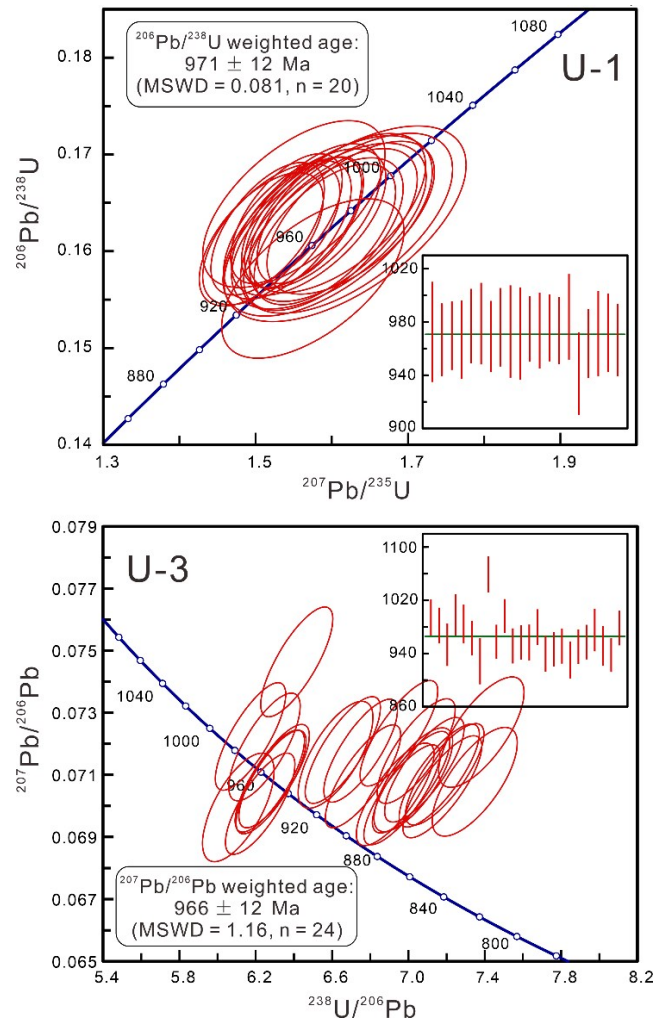

52

53

Fig. S1 The ages of CGM samples U-1 and U-3 acquired from LA-ICP-MS.

54

55 Table S1

56 Average major- and trace-element concentrations of the CGM and ferrotapiolite  
 57 samples, measured by EPMA and LA-ICP-MS.

| Sample                         | NP-2   | U-1    | U-3    | Coltan139 | 713-79 |
|--------------------------------|--------|--------|--------|-----------|--------|
| <i>Major elements (wt.%)</i>   |        |        |        |           |        |
| Number                         | 21     | 15     | 16     | 20        | 20     |
| WO <sub>3</sub>                | 0.18   | 1.08   | 0.88   | 0.74      | 0.21   |
| Nb <sub>2</sub> O <sub>5</sub> | 43.78  | 33.45  | 44.82  | 62.57     | 10.87  |
| Ta <sub>2</sub> O <sub>5</sub> | 36.65  | 47.78  | 34.55  | 12.67     | 65.71  |
| TiO <sub>2</sub>               | 0.11   | 0.01   | 0.08   | 3.32      | 6.50   |
| SnO <sub>2</sub>               | 0.28   | 0.09   | 0.27   | 0.61      | 0.97   |
| Sc <sub>2</sub> O <sub>3</sub> | 0.14   | 0.05   | 0.07   | 0.88      | 0.00   |
| FeO                            | 11.40  | 3.20   | 18.06  | 10.38     | 15.11  |
| MnO                            | 6.96   | 13.92  | 0.98   | 8.99      | 0.64   |
| Total                          | 99.50  | 99.58  | 99.71  | 100.15    | 100.00 |
| Ta <sup>#</sup>                | 0.34   | 0.46   | 0.32   | 0.11      | 0.78   |
| Mn <sup>#</sup>                | 0.38   | 0.81   | 0.05   | 0.49      | 0.04   |
| <i>Trace elements(ppm)</i>     |        |        |        |           |        |
| Number                         | 32     | 27     | 25     | 30        | 20     |
| Zr                             | 1785   | 797    | 7108   | 2925      | 1790   |
| Hf                             | 211    | 469    | 1430   | 454       | 712    |
| Pb                             | 9.77   | 3.95   | 157    | 147       | 12.8   |
| Th                             | 0.145  | 2.08   | 0.330  | 85.9      | 0.0065 |
| U                              | 192    | 27.4   | 1089   | 2118      | 443    |
| Y                              | 1.244  | 1.02   | 0.120  | 2350      | 0.155  |
| La                             | 10.2   | 0.0299 | 0.105  | 0.251     | 0.0473 |
| Ce                             | 19.7   | 0.0272 | 0.123  | 4.53      | 0.0291 |
| Pr                             | 1.588  | 0.0087 | 0.0306 | 2.18      | 0.016  |
| Nd                             | 0.893  | 0.0264 | 0.0420 | 29.1      | 0.0249 |
| Sm                             | <D.L.  | 0.0460 | 0.0748 | 128       | 0.03   |
| Eu                             | <D.L.  | 0.0128 | 0.0292 | 0.156     | 0.0086 |
| Gd                             | <D.L.  | 0.101  | 0.225  | 309       | 0.116  |
| Tb                             | <D.L.  | 0.0247 | 0.0170 | 94.8      | 0.013  |
| Dy                             | 0.237. | 0.205  | 0.0466 | 491       | 0.016  |
| Ho                             | 0.068  | 0.0372 | 0.0138 | 49        | 0.0035 |
| Er                             | 0.298  | 0.131  | 0.0265 | 82.8      | 0.0084 |
| Tm                             | 0.107  | 0.0390 | 0.0112 | 12.3      | 0.0035 |
| Yb                             | 1.610  | 0.483  | 0.0804 | 95.4      | 0.017  |
| Lu                             | 0.355  | 0.0681 | 0.0165 | 11.2      | 0.0043 |

58 All Fe is expressed as Fe<sup>2+</sup>; Ta<sup>#</sup> = molar Ta/(Ta + Nb); Mn<sup>#</sup> = molar Mn/(Mn + Ta).

59 <D.L.: lower than detection limit.

60 Data of samples Coltan139 and 713-79 quoted from Che *et al.* (2015).<sup>1</sup>

## 61 Table S2

## 62 U-Pb isotopic data of samples U-1 and U-3.

| Analysis_# | Th/ppm | U/ppm | U/Th | Isotope ratios                    |               |                                  |               |                                  |               | Ages (Ma)                         |               |                                  |               |                                  |               |
|------------|--------|-------|------|-----------------------------------|---------------|----------------------------------|---------------|----------------------------------|---------------|-----------------------------------|---------------|----------------------------------|---------------|----------------------------------|---------------|
|            |        |       |      | $^{207}\text{Pb}/^{206}\text{Pb}$ | $\pm 1\sigma$ | $^{207}\text{Pb}/^{235}\text{U}$ | $\pm 1\sigma$ | $^{206}\text{Pb}/^{238}\text{U}$ | $\pm 1\sigma$ | $^{207}\text{Pb}/^{206}\text{Pb}$ | $\pm 1\sigma$ | $^{207}\text{Pb}/^{235}\text{U}$ | $\pm 1\sigma$ | $^{206}\text{Pb}/^{238}\text{U}$ | $\pm 1\sigma$ |
| <b>U-1</b> |        |       |      |                                   |               |                                  |               |                                  |               |                                   |               |                                  |               |                                  |               |
| U-1_01     | 1.15   | 16.1  | 13.9 | 0.0721                            | 0.0051        | 1.6175                           | 0.1049        | 0.1628                           | 0.0067        | 988                               | 137           | 977                              | 41            | 973                              | 37            |
| U-1_02     | 1.98   | 25.0  | 12.6 | 0.0682                            | 0.0029        | 1.5206                           | 0.0595        | 0.1618                           | 0.0048        | 876                               | 84            | 939                              | 24            | 967                              | 27            |
| U-1_03     | 3.02   | 45.9  | 15.2 | 0.0678                            | 0.0023        | 1.5159                           | 0.0492        | 0.1623                           | 0.0045        | 862                               | 70            | 937                              | 20            | 970                              | 25            |
| U-1_04     | 2.00   | 24.3  | 12.1 | 0.0713                            | 0.0034        | 1.5891                           | 0.0691        | 0.1618                           | 0.0052        | 966                               | 93            | 966                              | 27            | 967                              | 29            |
| U-1_05     | 2.09   | 24.1  | 11.5 | 0.0698                            | 0.0029        | 1.5730                           | 0.0603        | 0.1636                           | 0.0049        | 922                               | 83            | 960                              | 24            | 977                              | 27            |
| U-1_06     | 1.64   | 17.1  | 10.4 | 0.0712                            | 0.0036        | 1.6072                           | 0.0765        | 0.1639                           | 0.0054        | 962                               | 101           | 973                              | 30            | 979                              | 30            |
| U-1_07     | 2.06   | 31.4  | 15.3 | 0.0690                            | 0.0027        | 1.5418                           | 0.0553        | 0.1622                           | 0.0047        | 899                               | 77            | 947                              | 22            | 969                              | 26            |
| U-1_08     | 1.82   | 24.3  | 13.4 | 0.0722                            | 0.0035        | 1.6248                           | 0.0726        | 0.1635                           | 0.0052        | 991                               | 95            | 980                              | 28            | 976                              | 29            |
| U-1_09     | 1.88   | 25.2  | 13.4 | 0.0722                            | 0.0045        | 1.6195                           | 0.0919        | 0.1629                           | 0.0061        | 991                               | 121           | 978                              | 36            | 973                              | 34            |
| U-1_10     | 1.70   | 18.1  | 10.7 | 0.0712                            | 0.0044        | 1.5947                           | 0.0907        | 0.1626                           | 0.0062        | 963                               | 122           | 968                              | 36            | 971                              | 34            |
| U-1_11     | 3.04   | 42.2  | 13.9 | 0.0699                            | 0.0022        | 1.5717                           | 0.0461        | 0.1632                           | 0.0043        | 926                               | 63            | 959                              | 18            | 975                              | 24            |
| U-1_12     | 2.01   | 24.0  | 12.0 | 0.0699                            | 0.0032        | 1.5697                           | 0.0669        | 0.1630                           | 0.0050        | 926                               | 91            | 958                              | 26            | 973                              | 28            |
| U-1_13     | 2.61   | 39.2  | 15.0 | 0.0685                            | 0.0023        | 1.5404                           | 0.0483        | 0.1634                           | 0.0044        | 883                               | 68            | 947                              | 19            | 976                              | 24            |
| U-1_14     | 2.82   | 40.9  | 14.5 | 0.0696                            | 0.0024        | 1.5623                           | 0.0507        | 0.1630                           | 0.0044        | 917                               | 70            | 955                              | 20            | 973                              | 25            |
| U-1_15     | 2.05   | 27.0  | 13.1 | 0.0683                            | 0.0038        | 1.5503                           | 0.0790        | 0.1649                           | 0.0057        | 877                               | 110           | 951                              | 31            | 984                              | 32            |
| U-1_16     | 2.18   | 26.4  | 12.1 | 0.0728                            | 0.0040        | 1.5751                           | 0.0790        | 0.1572                           | 0.0054        | 1007                              | 107           | 960                              | 31            | 941                              | 30            |
| U-1_17     | 1.47   | 16.5  | 11.2 | 0.0679                            | 0.0026        | 1.5074                           | 0.0537        | 0.1612                           | 0.0046        | 865                               | 78            | 933                              | 22            | 964                              | 25            |
| U-1_18     | 1.82   | 19.0  | 10.4 | 0.0713                            | 0.0041        | 1.5963                           | 0.0843        | 0.1626                           | 0.0057        | 965                               | 112           | 969                              | 33            | 971                              | 31            |
| U-1_19     | 2.21   | 33.1  | 15.0 | 0.0715                            | 0.0035        | 1.6023                           | 0.0726        | 0.1627                           | 0.0052        | 972                               | 97            | 971                              | 28            | 972                              | 29            |
| U-1_20     | 2.72   | 36.6  | 13.4 | 0.0714                            | 0.0030        | 1.5910                           | 0.0613        | 0.1618                           | 0.0048        | 969                               | 83            | 967                              | 24            | 967                              | 27            |
| <b>U-3</b> |        |       |      |                                   |               |                                  |               |                                  |               |                                   |               |                                  |               |                                  |               |
| U-3_01     | 0.199  | 727   | 3652 | 0.0723                            | 0.0009        | 1.6128                           | 0.0200        | 0.1620                           | 0.0032        | 994                               | 26            | 968                              | 18            | 975                              | 8             |
| U-3_02     | 0.2    | 693   | 3467 | 0.0719                            | 0.0009        | 1.4866                           | 0.0180        | 0.1502                           | 0.0030        | 982                               | 25            | 902                              | 17            | 925                              | 7             |

|        |       |      |      |        |        |        |        |        |        |      |    |     |    |     |    |
|--------|-------|------|------|--------|--------|--------|--------|--------|--------|------|----|-----|----|-----|----|
| U-3_03 | <D.L. | 491  | -    | 0.0709 | 0.0011 | 1.3274 | 0.0190 | 0.1360 | 0.0027 | 953  | 31 | 822 | 16 | 858 | 8  |
| U-3_04 | 0.129 | 473  | 3666 | 0.0724 | 0.0011 | 1.3509 | 0.0190 | 0.1354 | 0.0027 | 998  | 30 | 819 | 15 | 868 | 8  |
| U-3_05 | 0.224 | 759  | 3387 | 0.0720 | 0.0010 | 1.5861 | 0.0207 | 0.1600 | 0.0032 | 985  | 28 | 957 | 18 | 965 | 8  |
| U-3_06 | 0.313 | 1032 | 3298 | 0.0712 | 0.0009 | 1.3844 | 0.0164 | 0.1411 | 0.0027 | 963  | 25 | 851 | 15 | 882 | 7  |
| U-3_07 | 0.139 | 583  | 4192 | 0.0700 | 0.0012 | 1.5785 | 0.0244 | 0.1637 | 0.0033 | 928  | 33 | 977 | 18 | 962 | 10 |
| U-3_08 | 0.424 | 987  | 2327 | 0.0747 | 0.0010 | 1.6030 | 0.0197 | 0.1558 | 0.0030 | 1059 | 26 | 933 | 17 | 971 | 8  |
| U-3_09 | 0.337 | 1198 | 3555 | 0.0710 | 0.0009 | 1.3656 | 0.0157 | 0.1396 | 0.0027 | 958  | 24 | 842 | 15 | 874 | 7  |
| U-3_10 | 0.462 | 1361 | 2947 | 0.0724 | 0.0009 | 1.4342 | 0.0165 | 0.1438 | 0.0028 | 996  | 24 | 866 | 16 | 903 | 7  |
| U-3_11 | 0.282 | 1321 | 4684 | 0.0708 | 0.0009 | 1.5527 | 0.0184 | 0.1591 | 0.0031 | 951  | 25 | 952 | 17 | 952 | 7  |
| U-3_12 | 0.374 | 1323 | 3538 | 0.0710 | 0.0009 | 1.4458 | 0.0167 | 0.1478 | 0.0029 | 957  | 24 | 889 | 16 | 908 | 7  |
| U-3_13 | 0.378 | 1336 | 3534 | 0.0710 | 0.0009 | 1.5528 | 0.0187 | 0.1587 | 0.0031 | 957  | 26 | 950 | 17 | 952 | 7  |
| U-3_14 | 0.282 | 1091 | 3870 | 0.0718 | 0.0009 | 1.4045 | 0.0169 | 0.1420 | 0.0027 | 980  | 26 | 856 | 15 | 891 | 7  |
| U-3_15 | 0.374 | 1181 | 3158 | 0.0704 | 0.0009 | 1.3992 | 0.0168 | 0.1442 | 0.0028 | 940  | 26 | 869 | 16 | 889 | 7  |
| U-3_16 | 0.444 | 1445 | 3254 | 0.0706 | 0.0009 | 1.3559 | 0.0156 | 0.1393 | 0.0027 | 946  | 25 | 841 | 15 | 870 | 7  |
| U-3_17 | 0.395 | 1533 | 3881 | 0.0708 | 0.0009 | 1.5553 | 0.0183 | 0.1593 | 0.0031 | 951  | 25 | 953 | 17 | 953 | 7  |
| U-3_18 | 0.480 | 1488 | 3100 | 0.0701 | 0.0009 | 1.5518 | 0.0189 | 0.1606 | 0.0031 | 930  | 26 | 960 | 17 | 951 | 8  |
| U-3_19 | 0.488 | 1447 | 2965 | 0.0708 | 0.0009 | 1.3901 | 0.0161 | 0.1425 | 0.0027 | 950  | 25 | 859 | 15 | 885 | 7  |
| U-3_20 | 0.489 | 1712 | 3501 | 0.0710 | 0.0009 | 1.3610 | 0.0157 | 0.1390 | 0.0026 | 957  | 25 | 839 | 15 | 872 | 7  |
| U-3_21 | 0.192 | 773  | 4028 | 0.0716 | 0.0011 | 1.4916 | 0.0212 | 0.1510 | 0.0030 | 975  | 31 | 907 | 17 | 927 | 9  |
| U-3_22 | 0.334 | 1374 | 4114 | 0.0708 | 0.0010 | 1.3895 | 0.0182 | 0.1423 | 0.0028 | 952  | 28 | 858 | 16 | 885 | 8  |
| U-3_23 | 0.441 | 1805 | 4093 | 0.0703 | 0.0008 | 1.3921 | 0.0156 | 0.1435 | 0.0027 | 938  | 24 | 865 | 15 | 886 | 7  |
| U-3_24 | 0.442 | 1656 | 3747 | 0.0717 | 0.0009 | 1.4653 | 0.0172 | 0.1481 | 0.0028 | 979  | 25 | 890 | 16 | 916 | 7  |

64 Table S3

65 Ta/Hf ratios and concentrations of Ta and Hf in the mixed standard solutions.

| Spex Hf<br>(ng/mL) | Ta<br>(ng/mL) | Ta/Spex Hf | Alfa Hf<br>(ng/mL) | Ta<br>(ng/mL) | Ta/Alfa Hf |
|--------------------|---------------|------------|--------------------|---------------|------------|
| 50                 | 0             | 0          | 200                | 0             | 0          |
| 50                 | 50            | 1          | 200                | 200           | 1          |
| 50                 | 100           | 2          | 200                | 400           | 2          |
| 50                 | 250           | 5          | 200                | 1000          | 5          |
| 50                 | 500           | 10         | 200                | 1600          | 8          |
| 50                 | 750           | 15         | 200                | 2000          | 10         |
| 50                 | 1000          | 20         | 200                | 2400          | 12         |
| 50                 | 1250          | 25         | 200                | 3000          | 15         |
| 50                 | 1500          | 30         | 200                | 4000          | 20         |
| 50                 | 1750          | 35         | 200                | 5000          | 25         |
| 50                 | 2000          | 40         | 200                | 6000          | 30         |
| 50                 | 2500          | 50         | 200                | 7000          | 35         |
| 50                 | 3000          | 60         | 200                | 8000          | 40         |
|                    |               |            | 200                | 10000         | 50         |



## 67 Table S4

68 Comparisons of Hf isotopic ratios obtained in this study with published values for  
 69 standard materials.

| Standard            | $^{176}\text{Hf}/^{177}\text{Hf}$ | 2SE      | spike | Lab. | Reference values                                         |
|---------------------|-----------------------------------|----------|-------|------|----------------------------------------------------------|
| <i>MC-ICP-MS</i>    |                                   |          |       |      |                                                          |
| BCR-2               | 0.282870                          | 0.000015 |       |      | 0.282870 ± 08 (Weis <i>et al.</i> , 2007) <sup>3</sup>   |
| BCR-2               | 0.282877                          | 0.000013 | yes   | CAS  | 0.282858 ± 06 (Nebel <i>et al.</i> , 2009) <sup>4</sup>  |
|                     |                                   |          |       |      | 0.282877 ± 03 (Yang <i>et al.</i> , 2010) <sup>5</sup>   |
| <b>Mean(±2SD)</b>   | <b>0.282874(09)</b>               |          |       |      |                                                          |
| AGV-2               | 0.282984                          | 0.000016 |       |      | 0.282984 ± 09 (Weis <i>et al.</i> , 2007) <sup>3</sup>   |
| AGV-2               | 0.282988                          | 0.000014 | yes   | CAS  | 0.282978 ± 04 (Lei <i>et al.</i> , 2019) <sup>6</sup>    |
| <b>Mean(±2SD)</b>   | <b>0.282986(05)</b>               |          |       |      |                                                          |
| Alfa Hf             | 0.282192                          | 0.000007 |       |      |                                                          |
| Alfa Hf             | 0.282195                          | 0.000008 |       |      |                                                          |
| Alfa Hf             | 0.282185                          | 0.000010 | yes   | CAS  | 0.282185 ± 30 (In-house CAS Hf standard)                 |
| Alfa Hf             | 0.282189                          | 0.000010 |       |      |                                                          |
| Alfa Hf             | 0.282183                          | 0.000010 |       |      |                                                          |
| <b>Mean(±2SD)</b>   | <b>0.282189(10)</b>               |          |       |      |                                                          |
| BHVO-2              | 0.283098                          | 0.000004 |       |      |                                                          |
| BHVO-2              | 0.283099                          | 0.000007 |       |      | 0.283105 ± 11 (Weis <i>et al.</i> , 2007) <sup>3</sup>   |
| BHVO-2              | 0.283097                          | 0.000007 | yes   | CAS  | 0.283097 ± 14 (Fourny <i>et al.</i> , 2016) <sup>7</sup> |
| BHVO-2              | 0.283099                          | 0.000007 |       |      |                                                          |
| <b>Mean(±2SD)</b>   | <b>0.283098(01)</b>               |          |       |      |                                                          |
| BHVO-2              | 0.283098                          | 0.000008 | no    | CAS  | Same as above                                            |
| BIR-1a              | 0.283245                          | 0.000028 | no    | CAS  | 0.283266 ± 17 (Blichert-Toft, 2001) <sup>8</sup>         |
|                     |                                   |          |       |      | 0.283243 ± 34 (Fourny <i>et al.</i> , 2016) <sup>7</sup> |
| JMC475              | 0.282163                          | 0.000011 |       |      |                                                          |
| JMC475              | 0.282164                          | 0.000007 | no    | NJU  | 0.282158 ± 18 (Yang <i>et al.</i> , 2010) <sup>5</sup>   |
| JMC475              | 0.282162                          | 0.000015 |       |      | 0.282150 ± 7 (Lei <i>et al.</i> , 2019) <sup>6</sup>     |
| <b>Mean(±2SD)</b>   | <b>0.282163(01)</b>               |          |       |      |                                                          |
| BCR-2               | 0.282853                          | 0.000010 |       |      |                                                          |
| BCR-2               | 0.282855                          | 0.000007 | no    | NJU  | Same as above                                            |
| <b>Mean(±2SD)</b>   | <b>0.282854(04)</b>               |          |       |      |                                                          |
| <i>LA-MC-ICP-MS</i> |                                   |          |       | NJU  |                                                          |
| 91500_01            | 0.282281                          | 0.000031 |       |      | 0.282306 ± 8 (solution); 0.282296 ± 28                   |
| 91500_02            | 0.282282                          | 0.000020 |       |      | (laser) (Woodhead and Hergt, 2005) <sup>9</sup>          |
| 91500_03            | 0.282267                          | 0.000020 |       |      | 0.282307 ± 31 (laser) (Wu <i>et al.</i> ,                |
| 91500_04            | 0.282308                          | 0.000020 |       |      | 2006) <sup>10</sup>                                      |
| 91500_05            | 0.282329                          | 0.000022 |       |      |                                                          |
| 91500_06            | 0.282333                          | 0.000019 |       |      |                                                          |
| 91500_07            | 0.282302                          | 0.000023 |       |      |                                                          |
| 91500_08            | 0.282311                          | 0.000020 |       |      |                                                          |
| 91500_09            | 0.282299                          | 0.000020 |       |      |                                                          |
| 91500_10            | 0.282286                          | 0.000019 |       |      |                                                          |

|                   |                     |          |
|-------------------|---------------------|----------|
| 91500_11          | 0.282296            | 0.000019 |
| 91500_12          | 0.282301            | 0.000019 |
| 91500_13          | 0.282294            | 0.000018 |
| 91500_14          | 0.282293            | 0.000021 |
| 91500_15          | 0.282270            | 0.000021 |
| 91500_16          | 0.282298            | 0.000021 |
| 91500_17          | 0.282274            | 0.000021 |
| 91500_18          | 0.282305            | 0.000022 |
| 91500_19          | 0.282288            | 0.000020 |
| 91500_20          | 0.282284            | 0.000021 |
| 91500_21          | 0.282318            | 0.000020 |
| 91500_22          | 0.282282            | 0.000021 |
| 91500_23          | 0.282288            | 0.000020 |
| 91500_24          | 0.282274            | 0.000020 |
| 91500_25          | 0.282263            | 0.000022 |
| 91500_26          | 0.282289            | 0.000021 |
| 91500_27          | 0.282288            | 0.000021 |
| 91500_28          | 0.282299            | 0.000022 |
| 91500_29          | 0.282288            | 0.000021 |
| 91500_30          | 0.282310            | 0.000021 |
| <b>Mean(±2SD)</b> | <b>0.282293(34)</b> |          |

70 2SE means the 2 standard error of the individual analysis. 2SD means the 2 standard deviation on the  
71 mean of multiple analyses.

72 Table S5

73 Signal values in Alfa Hf and high concentration of Ta standard solutions using MC-ICP-MS.

| Ta<br>(ng/mL) | Alfa Hf (ng/mL) | <sup>173</sup> Yb (V) | <sup>175</sup> Lu (V) | <sup>176</sup> Hf (V) | <sup>177</sup> Hf (V) | <sup>178</sup> Hf (V) | <sup>179</sup> Hf (V) | <sup>180</sup> Hf (V) | <sup>181</sup> Ta*<br>(V) | <sup>183</sup> W (V) | Calculated value<br>of Hf (ng/mL) |
|---------------|-----------------|-----------------------|-----------------------|-----------------------|-----------------------|-----------------------|-----------------------|-----------------------|---------------------------|----------------------|-----------------------------------|
| 0             | 200             | -0.00001              | -0.00001              | 0.28391               | 1.01509               | 1.50238               | 0.75670               | 1.96592               | 0.00003                   | 0.00004              |                                   |
| 0             | 200             | -0.00001              | 0.00000               | 0.27996               | 1.00105               | 1.48171               | 0.74634               | 1.93921               | 0.00003                   | 0.00005              |                                   |
| 0             | 200             | -0.00001              | -0.00001              | 0.28866               | 1.03221               | 1.52786               | 0.76959               | 1.99961               | 0.00003                   | 0.00012              |                                   |
| 0             | 200             | -0.00001              | 0.00000               | 0.29174               | 1.04321               | 1.54417               | 0.77782               | 2.02101               | 0.00003                   | 0.00007              |                                   |
| 0             | 200             | 0.00000               | 0.00000               | 0.28987               | 1.03657               | 1.53439               | 0.77293               | 2.00839               | 0.00003                   | 0.00003              |                                   |
| 0             | 200             | -0.00001              | 0.00000               | 0.27108               | 0.96964               | 1.43574               | 0.72346               | 1.88042               | 0.00004                   | 0.00005              |                                   |
| 0             | 200             | 0.00000               | -0.00001              | 0.26907               | 0.96252               | 1.42521               | 0.71817               | 1.86671               | 0.00003                   | 0.00011              |                                   |
| 0             | 200             | -0.00001              | -0.00001              | 0.26921               | 0.96306               | 1.42610               | 0.71864               | 1.86802               | 0.00003                   | 0.00023              |                                   |
| 0             | 200             | -0.00001              | 0.00000               | 0.27041               | 0.96734               | 1.43245               | 0.72183               | 1.87630               | 0.00003                   | 0.00003              |                                   |
|               | Mean            | -0.00001              | 0.00000               | 0.27932               | 0.99897               | 1.47889               | 0.74505               | 1.93618               | 0.00003                   | 0.00008              |                                   |
| 1000          | 0               | -0.00001              | -0.00001              | 0.00002               | 0.00007               | 0.00011               | 0.00008               | 0.00304               | 0.00056                   | 0.00328              | 0.015                             |
| 10000         | 0               | 0.00004               | 0.00001               | 0.00009               | 0.00016               | 0.00024               | 0.00040               | 0.02831               | 0.00560                   | 0.02532              | 0.033                             |

74 <sup>181</sup>Ta\*: Signal of <sup>181</sup>Ta of 1000 ng/mL and 10000 ng/mL Ta solutions can not be collected in Faraday cup, the data in this column does not represent the true value.

75

## 76 Table S6

## 77 Hf isotopes of Spex Hf + Ta and Alfa Hf + Ta solution passed through column II and no column.

| Hf<br>(ng/mL)                | Ta<br>(ng/mL) | Ta/Hf | $^{176}\text{Hf}/^{177}\text{Hf}$ | 2SE      | $^{176}\text{Hf}/^{177}\text{Hf}$                                           | 2SE      | $^{176}\text{Hf}/^{177}\text{Hf}$                                           | 2SE      | $^{176}\text{Hf}/^{177}\text{Hf}$ | 2SE |
|------------------------------|---------------|-------|-----------------------------------|----------|-----------------------------------------------------------------------------|----------|-----------------------------------------------------------------------------|----------|-----------------------------------|-----|
|                              |               |       | no column (raw value)             |          | no column (normalization of<br>$^{179}\text{Hf}/^{177}\text{Hf} = 0.7325$ ) |          | no column (normalization of<br>$^{178}\text{Hf}/^{177}\text{Hf} = 1.4672$ ) |          | column II (raw value)             |     |
| <i>Spex Hf + Ta solution</i> |               |       |                                   |          |                                                                             |          |                                                                             |          |                                   |     |
| 50                           | 0             | 0     | 0.282141                          | 0.000013 |                                                                             |          |                                                                             |          |                                   |     |
| 50                           | 0             | 0     | 0.282142                          | 0.000017 |                                                                             |          |                                                                             |          |                                   |     |
| 50                           | 0             | 0     | 0.282140                          | 0.000017 |                                                                             |          |                                                                             |          |                                   |     |
| 50                           | 50            | 1     | 0.282154                          | 0.000016 | 0.282126                                                                    | 0.000016 | 0.282117                                                                    | 0.000016 |                                   |     |
| 50                           | 100           | 2     | 0.282150                          | 0.000016 | 0.282133                                                                    | 0.000016 | 0.282117                                                                    | 0.000016 |                                   |     |
| 50                           | 250           | 5     | 0.282164                          | 0.000016 | 0.282142                                                                    | 0.000016 | 0.282118                                                                    | 0.000016 |                                   |     |
| 50                           | 500           | 10    | 0.282187                          | 0.000013 | 0.282171                                                                    | 0.000013 | 0.282128                                                                    | 0.000013 |                                   |     |
| 50                           | 750           | 15    | 0.282219                          | 0.000017 | 0.282212                                                                    | 0.000017 | 0.282156                                                                    | 0.000017 |                                   |     |
| 50                           | 1000          | 20    | 0.282211                          | 0.000017 | 0.282226                                                                    | 0.000017 | 0.282152                                                                    | 0.000017 |                                   |     |
| 50                           | 1250          | 25    | 0.282231                          | 0.000013 | 0.282215                                                                    | 0.000013 | 0.282147                                                                    | 0.000013 |                                   |     |
| 50                           | 1500          | 30    | 0.282255                          | 0.000015 | 0.282233                                                                    | 0.000015 | 0.282151                                                                    | 0.000015 |                                   |     |
| 50                           | 1750          | 35    | 0.282257                          | 0.000014 | 0.282242                                                                    | 0.000014 | 0.282148                                                                    | 0.000014 |                                   |     |
| 50                           | 2000          | 40    | 0.282279                          | 0.000016 | 0.282273                                                                    | 0.000016 | 0.282164                                                                    | 0.000016 |                                   |     |
| 50                           | 2500          | 50    | 0.282314                          | 0.000015 | 0.282310                                                                    | 0.000015 | 0.282180                                                                    | 0.000015 |                                   |     |
| 50                           | 3000          | 60    | 0.282353                          | 0.000017 | 0.282340                                                                    | 0.000017 | 0.282171                                                                    | 0.000017 |                                   |     |
| <i>Alfa Hf + Ta solution</i> |               |       |                                   |          |                                                                             |          |                                                                             |          |                                   |     |
| 200                          | 0             | 0     | 0.282172                          | 0.000011 |                                                                             |          |                                                                             |          |                                   |     |
| 200                          | 0             | 0     | 0.282161                          | 0.000010 |                                                                             |          |                                                                             |          |                                   |     |
| 200                          | 0             | 0     | 0.282178                          | 0.000010 |                                                                             |          |                                                                             |          |                                   |     |
| 200                          | 0             | 0     | 0.282167                          | 0.000012 |                                                                             |          |                                                                             |          |                                   |     |

|     |       |    |          |          |          |          |          |          |          |          |
|-----|-------|----|----------|----------|----------|----------|----------|----------|----------|----------|
| 200 | 0     | 0  | 0.282177 | 0.000013 |          |          |          |          |          |          |
| 200 | 0     | 0  | 0.282166 | 0.000011 |          |          |          |          |          |          |
| 200 | 0     | 0  | 0.282169 | 0.000012 |          |          |          |          |          |          |
| 200 | 0     | 0  | 0.282171 | 0.000011 |          |          |          |          |          |          |
| 200 | 200   | 1  | 0.282169 | 0.000013 | 0.282170 | 0.000013 | 0.282151 | 0.000013 | 0.282177 | 0.000006 |
| 200 | 400   | 2  | 0.282180 | 0.000010 | 0.282175 | 0.000010 | 0.282154 | 0.000010 | 0.282180 | 0.000011 |
| 200 | 1000  | 5  | 0.282197 | 0.000011 | 0.282196 | 0.000011 | 0.282168 | 0.000011 | 0.282184 | 0.000008 |
| 200 | 1600  | 8  | 0.282184 | 0.000012 | 0.282184 | 0.000012 | 0.282157 | 0.000012 | 0.282178 | 0.000009 |
| 200 | 2000  | 10 | 0.282191 | 0.000010 | 0.282189 | 0.000010 | 0.282162 | 0.000010 | 0.282176 | 0.000009 |
| 200 | 2400  | 12 | 0.282207 | 0.000011 | 0.282202 | 0.000011 | 0.282176 | 0.000011 | 0.282179 | 0.000009 |
| 200 | 3000  | 15 | 0.282202 | 0.000011 | 0.282201 | 0.000011 | 0.282173 | 0.000011 | 0.282174 | 0.000010 |
| 200 | 4000  | 20 | 0.282210 | 0.000010 | 0.282210 | 0.000010 | 0.282173 | 0.000010 | 0.282180 | 0.000010 |
| 200 | 5000  | 25 | 0.282221 | 0.000011 | 0.282216 | 0.000011 | 0.282174 | 0.000011 | 0.282180 | 0.000010 |
| 200 | 6000  | 30 | 0.282218 | 0.000012 | 0.282220 | 0.000012 | 0.282171 | 0.000012 | 0.282182 | 0.000009 |
| 200 | 7000  | 35 | 0.282236 | 0.000009 | 0.282232 | 0.000009 | 0.282180 | 0.000009 | 0.282176 | 0.000011 |
| 200 | 8000  | 40 | 0.282246 | 0.000010 | 0.282243 | 0.000010 | 0.282177 | 0.000010 | 0.282173 | 0.000012 |
| 200 | 10000 | 50 | 0.282250 | 0.000013 | 0.282256 | 0.000013 | 0.282182 | 0.000013 | 0.282174 | 0.000011 |

79 Table S7

80 Hf isotopes of CGM and ferrotapiolite samples by LA-MC-ICP-MS ( $^{179}\text{Hf}/^{177}\text{Hf}$  normalization).

|                                                             | beta 2/3Yb | 2SE  | beta 7/9Hf | 2SE  | $^{176}\text{Yb}/^{177}\text{Hf}$ | 2SE     | $^{176}\text{Lu}/^{177}\text{Hf}$ | 2SE     | $^{176}\text{Hf}/^{177}\text{Hf}$ | 2SE      |
|-------------------------------------------------------------|------------|------|------------|------|-----------------------------------|---------|-----------------------------------|---------|-----------------------------------|----------|
| <b><i>NP-2 (120<math>\mu\text{m}20\text{Hz}</math>)</i></b> |            |      |            |      |                                   |         |                                   |         |                                   |          |
| NP-2_01                                                     | -2.63      | 0.57 | -1.95      | 0.01 | 0.00603                           | 0.00001 | 0.000251                          | 0.00000 | 0.282455                          | 0.000033 |
| NP-2_02                                                     | -2.88      | 0.55 | -1.93      | 0.01 | 0.00599                           | 0.00002 | 0.000248                          | 0.00000 | 0.282399                          | 0.000030 |
| NP-2_03                                                     | -2.49      | 0.52 | -1.93      | 0.01 | 0.00616                           | 0.00005 | 0.000256                          | 0.00000 | 0.282479                          | 0.000028 |
| NP-2_04                                                     | -3.00      | 0.71 | -1.95      | 0.01 | 0.00607                           | 0.00002 | 0.000252                          | 0.00000 | 0.282431                          | 0.000035 |
| NP-2_05                                                     | -3.30      | 0.62 | -1.94      | 0.01 | 0.00604                           | 0.00002 | 0.000249                          | 0.00000 | 0.282366                          | 0.000032 |
| NP-2_06                                                     | -2.28      | 0.47 | -1.91      | 0.01 | 0.00647                           | 0.00005 | 0.000269                          | 0.00000 | 0.282427                          | 0.000028 |
| NP-2_07                                                     | -2.23      | 0.54 | -1.94      | 0.01 | 0.00614                           | 0.00003 | 0.000257                          | 0.00000 | 0.282497                          | 0.000033 |
| NP-2_08                                                     | -2.50      | 0.54 | -1.94      | 0.01 | 0.00674                           | 0.00012 | 0.000275                          | 0.00000 | 0.282450                          | 0.000030 |
| NP-2_09                                                     | -1.97      | 0.51 | -1.94      | 0.01 | 0.00594                           | 0.00001 | 0.000250                          | 0.00000 | 0.282515                          | 0.000031 |
| NP-2_10                                                     | -2.83      | 0.65 | -1.99      | 0.01 | 0.00642                           | 0.00003 | 0.000266                          | 0.00000 | 0.282513                          | 0.000038 |
| NP-2_11                                                     | -2.45      | 0.55 | -1.95      | 0.01 | 0.00574                           | 0.00008 | 0.000239                          | 0.00000 | 0.282489                          | 0.000030 |
| NP-2_12                                                     | -2.62      | 0.48 | -1.93      | 0.01 | 0.00598                           | 0.00001 | 0.000248                          | 0.00000 | 0.282401                          | 0.000032 |
| NP-2_13                                                     | -1.97      | 0.79 | -2.03      | 0.01 | 0.00616                           | 0.00007 | 0.000258                          | 0.00000 | 0.282678                          | 0.000045 |
| NP-2_14                                                     | -2.86      | 0.56 | -1.94      | 0.01 | 0.00571                           | 0.00001 | 0.000237                          | 0.00000 | 0.282403                          | 0.000029 |
| NP-2_15                                                     | -2.89      | 0.62 | -1.93      | 0.01 | 0.00583                           | 0.00002 | 0.000242                          | 0.00000 | 0.282432                          | 0.000031 |
| NP-2_16                                                     | -3.01      | 0.68 | -1.94      | 0.01 | 0.00602                           | 0.00001 | 0.000248                          | 0.00000 | 0.282362                          | 0.000031 |
| NP-2_17                                                     | -2.87      | 0.64 | -1.93      | 0.01 | 0.00584                           | 0.00001 | 0.000243                          | 0.00000 | 0.282391                          | 0.000032 |
| NP-2_18                                                     | -2.59      | 0.66 | -1.95      | 0.01 | 0.00565                           | 0.00003 | 0.000236                          | 0.00000 | 0.282505                          | 0.000036 |
| NP-2_19                                                     | -2.34      | 0.50 | -1.90      | 0.01 | 0.00577                           | 0.00006 | 0.000241                          | 0.00000 | 0.282389                          | 0.000030 |
| NP-2_20                                                     | -2.82      | 0.60 | -1.93      | 0.01 | 0.00591                           | 0.00001 | 0.000245                          | 0.00000 | 0.282413                          | 0.000030 |
| NP-2_21                                                     | -2.97      | 0.67 | -1.96      | 0.01 | 0.00592                           | 0.00001 | 0.000246                          | 0.00000 | 0.282422                          | 0.000038 |
| <b>Mean [<math>\pm 2\text{SD}</math>]</b>                   |            |      |            |      |                                   |         |                                   |         | <b>0.282448[142]</b>              |          |
| <b><i>U-1 (120<math>\mu\text{m}20\text{Hz}</math>)</i></b>  |            |      |            |      |                                   |         |                                   |         |                                   |          |
| U-1_01                                                      | -10.40     | 3.38 | -2.02      | 0.01 | 0.00122                           | 0.00001 | 0.000033                          | 0.00000 | 0.282140                          | 0.000027 |

|        |        |      |       |      |         |         |          |         |          |          |
|--------|--------|------|-------|------|---------|---------|----------|---------|----------|----------|
| U-1_02 | -12.68 | 2.76 | -2.03 | 0.01 | 0.00133 | 0.00001 | 0.000034 | 0.00000 | 0.282045 | 0.000032 |
| U-1_03 | -11.38 | 2.74 | -2.03 | 0.01 | 0.00134 | 0.00001 | 0.000035 | 0.00000 | 0.282083 | 0.000034 |
| U-1_04 | -8.45  | 2.92 | -2.03 | 0.01 | 0.00122 | 0.00001 | 0.000034 | 0.00000 | 0.282168 | 0.000029 |
| U-1_05 | -5.34  | 5.65 | -2.05 | 0.01 | 0.00115 | 0.00001 | 0.000033 | 0.00000 | 0.282280 | 0.000032 |
| U-1_06 | -10.10 | 2.80 | -2.03 | 0.01 | 0.00130 | 0.00001 | 0.000035 | 0.00000 | 0.282142 | 0.000029 |
| U-1_07 | -9.59  | 2.96 | -2.07 | 0.01 | 0.00138 | 0.00002 | 0.000038 | 0.00000 | 0.282186 | 0.000031 |
| U-1_08 | -8.69  | 3.09 | -2.03 | 0.01 | 0.00121 | 0.00001 | 0.000034 | 0.00000 | 0.282179 | 0.000030 |
| U-1_09 | -9.00  | 3.97 | -2.17 | 0.01 | 0.00165 | 0.00002 | 0.000045 | 0.00000 | 0.282440 | 0.000048 |
| U-1_10 | -9.11  | 2.74 | -2.06 | 0.01 | 0.00133 | 0.00001 | 0.000037 | 0.00000 | 0.282184 | 0.000034 |
| U-1_11 | -14.75 | 3.53 | -2.11 | 0.01 | 0.00131 | 0.00002 | 0.000034 | 0.00000 | 0.282173 | 0.000034 |
| U-1_12 | -16.14 | 5.67 | -2.33 | 0.01 | 0.00163 | 0.00003 | 0.000044 | 0.00000 | 0.282546 | 0.000063 |
| U-1_13 | -9.66  | 4.56 | -2.13 | 0.01 | 0.00109 | 0.00002 | 0.000032 | 0.00000 | 0.282350 | 0.000032 |
| U-1_14 | -18.49 | 6.49 | -2.47 | 0.01 | 0.00195 | 0.00005 | 0.000052 | 0.00000 | 0.282707 | 0.000075 |
| U-1_15 | -9.67  | 3.47 | -2.09 | 0.01 | 0.00126 | 0.00001 | 0.000035 | 0.00000 | 0.282255 | 0.000034 |
| U-1_16 | -9.21  | 2.68 | -2.11 | 0.01 | 0.00162 | 0.00003 | 0.000045 | 0.00000 | 0.282237 | 0.000037 |
| U-1_17 | -9.36  | 2.53 | -2.04 | 0.01 | 0.00123 | 0.00001 | 0.000034 | 0.00000 | 0.282140 | 0.000029 |
| U-1_18 | -11.77 | 2.74 | -2.05 | 0.01 | 0.00129 | 0.00001 | 0.000035 | 0.00000 | 0.282076 | 0.000031 |
| U-1_19 | -12.43 | 4.39 | -2.36 | 0.01 | 0.00206 | 0.00003 | 0.000059 | 0.00000 | 0.282646 | 0.000061 |
| U-1_20 | -11.98 | 5.64 | -2.07 | 0.01 | 0.00128 | 0.00002 | 0.000035 | 0.00000 | 0.282184 | 0.000047 |
| U-1_21 | -12.03 | 4.14 | -2.03 | 0.01 | 0.00110 | 0.00002 | 0.000031 | 0.00000 | 0.282126 | 0.000031 |
| U-1_22 | -11.13 | 3.24 | -2.05 | 0.01 | 0.00120 | 0.00001 | 0.000033 | 0.00000 | 0.282159 | 0.000032 |
| U-1_23 | -9.78  | 3.12 | -2.06 | 0.01 | 0.00128 | 0.00002 | 0.000036 | 0.00000 | 0.282176 | 0.000039 |
| U-1_24 | -12.10 | 3.29 | -2.05 | 0.01 | 0.00114 | 0.00001 | 0.000031 | 0.00000 | 0.282139 | 0.000031 |
| U-1_25 | -15.73 | 4.05 | -2.04 | 0.01 | 0.00117 | 0.00002 | 0.000031 | 0.00000 | 0.282002 | 0.000035 |
| U-1_26 | -10.41 | 2.88 | -2.06 | 0.01 | 0.00148 | 0.00002 | 0.000040 | 0.00000 | 0.282084 | 0.000039 |
| U-1_27 | -11.28 | 3.20 | -2.05 | 0.01 | 0.00118 | 0.00001 | 0.000032 | 0.00000 | 0.282121 | 0.000031 |
| U-1_28 | -13.99 | 3.86 | -2.11 | 0.01 | 0.00126 | 0.00002 | 0.000033 | 0.00000 | 0.282225 | 0.000034 |
| U-1_29 | -9.57  | 3.68 | -2.13 | 0.01 | 0.00125 | 0.00002 | 0.000035 | 0.00000 | 0.282313 | 0.000037 |

| <b>Mean [±2SD]</b>                  | <b>0.282224[338]</b> |      |       |      |         |         |          |         |          |          |
|-------------------------------------|----------------------|------|-------|------|---------|---------|----------|---------|----------|----------|
| <b><i>U-3 (120µm20Hz)</i></b>       |                      |      |       |      |         |         |          |         |          |          |
| U-3_01                              | -1.83                | 0.01 | -1.83 | 0.01 | 0.00002 | 0.00000 | 0.000002 | 0.00000 | 0.281845 | 0.000018 |
| U-3_02                              | -1.82                | 0.01 | -1.82 | 0.01 | 0.00002 | 0.00000 | 0.000002 | 0.00000 | 0.281852 | 0.000015 |
| U-3_03                              | -1.82                | 0.01 | -1.82 | 0.01 | 0.00002 | 0.00000 | 0.000002 | 0.00000 | 0.281850 | 0.000015 |
| U-3_04                              | -1.82                | 0.00 | -1.82 | 0.00 | 0.00002 | 0.00000 | 0.000002 | 0.00000 | 0.281820 | 0.000015 |
| U-3_05                              | -1.83                | 0.01 | -1.83 | 0.01 | 0.00002 | 0.00000 | 0.000002 | 0.00000 | 0.281833 | 0.000014 |
| U-3_06                              | -1.83                | 0.00 | -1.83 | 0.00 | 0.00006 | 0.00000 | 0.000004 | 0.00000 | 0.281826 | 0.000014 |
| U-3_07                              | -1.83                | 0.00 | -1.83 | 0.00 | 0.00052 | 0.00003 | 0.000025 | 0.00000 | 0.281849 | 0.000015 |
| U-3_08                              | -1.82                | 0.00 | -1.82 | 0.00 | 0.00009 | 0.00001 | 0.000004 | 0.00000 | 0.281823 | 0.000016 |
| U-3_09                              | -1.82                | 0.00 | -1.82 | 0.00 | 0.00007 | 0.00001 | 0.000003 | 0.00000 | 0.281832 | 0.000016 |
| U-3_10                              | -1.81                | 0.00 | -1.81 | 0.00 | 0.00002 | 0.00000 | 0.000002 | 0.00000 | 0.281837 | 0.000015 |
| U-3_11                              | -1.81                | 0.00 | -1.81 | 0.00 | 0.00002 | 0.00000 | 0.000002 | 0.00000 | 0.281833 | 0.000016 |
| U-3_12                              | -1.81                | 0.00 | -1.81 | 0.00 | 0.00002 | 0.00000 | 0.000002 | 0.00000 | 0.281829 | 0.000016 |
| U-3_13                              | -1.81                | 0.00 | -1.81 | 0.00 | 0.00009 | 0.00000 | 0.000004 | 0.00000 | 0.281815 | 0.000016 |
| U-3_14                              | -1.80                | 0.00 | -1.80 | 0.00 | 0.00002 | 0.00000 | 0.000002 | 0.00000 | 0.281814 | 0.000015 |
| U-3_15                              | -1.80                | 0.00 | -1.80 | 0.00 | 0.00007 | 0.00000 | 0.000004 | 0.00000 | 0.281816 | 0.000016 |
| U-3_16                              | -1.81                | 0.00 | -1.81 | 0.00 | 0.00003 | 0.00000 | 0.000002 | 0.00000 | 0.281817 | 0.000015 |
| U-3_17                              | -1.81                | 0.00 | -1.81 | 0.00 | 0.00002 | 0.00000 | 0.000002 | 0.00000 | 0.281822 | 0.000016 |
| U-3_18                              | -1.80                | 0.00 | -1.80 | 0.00 | 0.00002 | 0.00000 | 0.000002 | 0.00000 | 0.281823 | 0.000015 |
| U-3_19                              | -1.81                | 0.00 | -1.81 | 0.00 | 0.00006 | 0.00000 | 0.000004 | 0.00000 | 0.281798 | 0.000015 |
| U-3_20                              | -1.80                | 0.00 | -1.80 | 0.00 | 0.00002 | 0.00000 | 0.000002 | 0.00000 | 0.281826 | 0.000016 |
| U-3_21                              | -1.82                | 0.01 | -1.82 | 0.01 | 0.00326 | 0.00017 | 0.000120 | 0.00001 | 0.281837 | 0.000016 |
| U-3_22                              | -1.82                | 0.00 | -1.82 | 0.00 | 0.00087 | 0.00008 | 0.000035 | 0.00000 | 0.281858 | 0.000018 |
| <b>Mean [±2SD]</b>                  | <b>0.281830[29]</b>  |      |       |      |         |         |          |         |          |          |
| <b><i>Coltan139 (160µm20Hz)</i></b> |                      |      |       |      |         |         |          |         |          |          |
| Coltan139_01                        | -1.51                | 0.02 | -1.81 | 0.00 | 0.13323 | 0.00003 | 0.003371 | 0.00000 | 0.282104 | 0.000021 |
| Coltan139_02                        | -1.50                | 0.02 | -1.81 | 0.00 | 0.13303 | 0.00005 | 0.003374 | 0.00000 | 0.282130 | 0.000022 |



|                           |       |      |       |      |         |         |          |         |                     |          |
|---------------------------|-------|------|-------|------|---------|---------|----------|---------|---------------------|----------|
| Coltan139_03              | -1.52 | 0.02 | -1.81 | 0.00 | 0.13367 | 0.00008 | 0.003383 | 0.00000 | 0.282033            | 0.000022 |
| Coltan139_04              | -1.54 | 0.02 | -1.81 | 0.00 | 0.13418 | 0.00006 | 0.003389 | 0.00000 | 0.281999            | 0.000023 |
| Coltan139_05              | -1.52 | 0.02 | -1.81 | 0.00 | 0.13402 | 0.00004 | 0.003381 | 0.00000 | 0.282050            | 0.000021 |
| Coltan139_06              | -1.53 | 0.02 | -1.81 | 0.00 | 0.13403 | 0.00004 | 0.003388 | 0.00000 | 0.282031            | 0.000024 |
| Coltan139_07              | -1.51 | 0.02 | -1.80 | 0.00 | 0.13466 | 0.00003 | 0.003389 | 0.00000 | 0.282073            | 0.000023 |
| Coltan139_08              | -1.52 | 0.02 | -1.80 | 0.00 | 0.13550 | 0.00005 | 0.003408 | 0.00000 | 0.282028            | 0.000020 |
| Coltan139_09              | -1.52 | 0.02 | -1.81 | 0.00 | 0.13813 | 0.00004 | 0.003474 | 0.00000 | 0.282101            | 0.000022 |
| Coltan139_10              | -1.53 | 0.02 | -1.81 | 0.00 | 0.14006 | 0.00004 | 0.003516 | 0.00000 | 0.282044            | 0.000020 |
| Coltan139_11              | -1.51 | 0.02 | -1.81 | 0.00 | 0.13405 | 0.00004 | 0.003400 | 0.00000 | 0.282091            | 0.000023 |
| Coltan139_12              | -1.51 | 0.02 | -1.81 | 0.00 | 0.13488 | 0.00003 | 0.003423 | 0.00000 | 0.282087            | 0.000024 |
| Coltan139_13              | -1.51 | 0.02 | -1.81 | 0.00 | 0.13573 | 0.00008 | 0.003447 | 0.00000 | 0.282153            | 0.000024 |
| Coltan139_14              | -1.51 | 0.02 | -1.81 | 0.00 | 0.13438 | 0.00003 | 0.003414 | 0.00000 | 0.282111            | 0.000023 |
| Coltan139_15              | -1.50 | 0.02 | -1.82 | 0.00 | 0.13524 | 0.00003 | 0.003440 | 0.00000 | 0.282165            | 0.000023 |
| Coltan139_16              | -1.54 | 0.02 | -1.82 | 0.00 | 0.13356 | 0.00005 | 0.003383 | 0.00000 | 0.281999            | 0.000022 |
| Coltan139_17              | -1.52 | 0.02 | -1.81 | 0.00 | 0.13428 | 0.00006 | 0.003402 | 0.00000 | 0.282064            | 0.000023 |
| Coltan139_18              | -1.52 | 0.02 | -1.81 | 0.00 | 0.13554 | 0.00005 | 0.003429 | 0.00000 | 0.282072            | 0.000021 |
| Coltan139_19              | -1.51 | 0.02 | -1.81 | 0.00 | 0.13636 | 0.00021 | 0.003468 | 0.00001 | 0.282120            | 0.000024 |
| Coltan139_20              | -1.51 | 0.02 | -1.81 | 0.00 | 0.13496 | 0.00005 | 0.003424 | 0.00000 | 0.282120            | 0.000023 |
| <b>Mean [±2SD]</b>        |       |      |       |      |         |         |          |         | <b>0.282079[96]</b> |          |
| <hr/>                     |       |      |       |      |         |         |          |         |                     |          |
| <b>713-79 (160µm20Hz)</b> |       |      |       |      |         |         |          |         |                     |          |
| 713-79_01                 | -1.86 | 0.00 | -1.86 | 0.00 | 0.00017 | 0.00001 | 0.000012 | 0.00000 | 0.283006            | 0.000019 |
| 713-79_02                 | -1.96 | 0.01 | -1.96 | 0.01 | 0.00021 | 0.00001 | 0.000015 | 0.00000 | 0.283221            | 0.000031 |
| 713-79_03                 | -1.93 | 0.01 | -1.93 | 0.01 | 0.00030 | 0.00001 | 0.000019 | 0.00000 | 0.283131            | 0.000027 |
| 713-79_04                 | -1.96 | 0.01 | -1.96 | 0.01 | 0.00019 | 0.00001 | 0.000013 | 0.00000 | 0.283227            | 0.000033 |
| 713-79_05                 | -1.94 | 0.01 | -1.94 | 0.01 | 0.00025 | 0.00001 | 0.000018 | 0.00000 | 0.283185            | 0.000026 |
| 713-79_06                 | -2.00 | 0.01 | -2.00 | 0.01 | 0.00040 | 0.00002 | 0.000023 | 0.00000 | 0.283307            | 0.000037 |
| 713-79_07                 | -1.94 | 0.01 | -1.94 | 0.01 | 0.00064 | 0.00002 | 0.000028 | 0.00000 | 0.283191            | 0.000031 |
| 713-79_08                 | -1.96 | 0.01 | -1.96 | 0.01 | 0.00052 | 0.00008 | 0.000027 | 0.00000 | 0.283158            | 0.000030 |

|           |       |      |       |      |         |         |          |         |          |          |
|-----------|-------|------|-------|------|---------|---------|----------|---------|----------|----------|
| 713-79_09 | -1.96 | 0.01 | -1.96 | 0.01 | 0.00036 | 0.00001 | 0.000019 | 0.00000 | 0.283184 | 0.000031 |
| 713-79_10 | -1.97 | 0.01 | -1.97 | 0.01 | 0.00286 | 0.00024 | 0.000105 | 0.00001 | 0.283207 | 0.000034 |
| 713-79_11 | -2.05 | 0.01 | -2.05 | 0.01 | 0.00059 | 0.00002 | 0.000038 | 0.00000 | 0.283386 | 0.000043 |
| 713-79_12 | -1.90 | 0.00 | -1.90 | 0.00 | 0.00021 | 0.00001 | 0.000015 | 0.00000 | 0.283095 | 0.000021 |
| 713-79_13 | -1.96 | 0.01 | -1.96 | 0.01 | 0.00024 | 0.00001 | 0.000015 | 0.00000 | 0.283241 | 0.000027 |
| 713-79_14 | -1.94 | 0.01 | -1.94 | 0.01 | 0.00025 | 0.00001 | 0.000017 | 0.00000 | 0.283193 | 0.000030 |
| 713-79_15 | -1.95 | 0.01 | -1.95 | 0.01 | 0.00023 | 0.00001 | 0.000016 | 0.00000 | 0.283184 | 0.000028 |
| 713-79_16 | -1.95 | 0.01 | -1.95 | 0.01 | 0.00022 | 0.00001 | 0.000016 | 0.00000 | 0.283201 | 0.000029 |
| 713-79_17 | -1.94 | 0.01 | -1.94 | 0.01 | 0.00024 | 0.00001 | 0.000016 | 0.00000 | 0.283155 | 0.000029 |
| 713-79_18 | -1.95 | 0.01 | -1.95 | 0.01 | 0.00025 | 0.00001 | 0.000017 | 0.00000 | 0.283179 | 0.000025 |
| 713-79_19 | -1.94 | 0.01 | -1.94 | 0.01 | 0.00024 | 0.00001 | 0.000017 | 0.00000 | 0.283180 | 0.000026 |
| 713-79_20 | -1.95 | 0.01 | -1.95 | 0.01 | 0.00023 | 0.00001 | 0.000016 | 0.00000 | 0.283183 | 0.000029 |
| 713-79_21 | -1.96 | 0.00 | -1.96 | 0.00 | 0.00020 | 0.00001 | 0.000015 | 0.00000 | 0.283178 | 0.000029 |
| 713-79_22 | -1.95 | 0.00 | -1.95 | 0.00 | 0.00024 | 0.00001 | 0.000017 | 0.00000 | 0.283157 | 0.000024 |
| 713-79_23 | -1.95 | 0.01 | -1.95 | 0.01 | 0.00025 | 0.00001 | 0.000017 | 0.00000 | 0.283165 | 0.000027 |
| 713-79_24 | -1.97 | 0.01 | -1.97 | 0.01 | 0.00019 | 0.00001 | 0.000014 | 0.00000 | 0.283217 | 0.000024 |
| 713-79_25 | -1.96 | 0.01 | -1.96 | 0.01 | 0.00018 | 0.00001 | 0.000013 | 0.00000 | 0.283170 | 0.000031 |
| 713-79_26 | -1.98 | 0.01 | -1.98 | 0.01 | 0.00018 | 0.00001 | 0.000013 | 0.00000 | 0.283258 | 0.000030 |
| 713-79_27 | -1.94 | 0.01 | -1.94 | 0.01 | 0.00025 | 0.00001 | 0.000017 | 0.00000 | 0.283148 | 0.000026 |
| 713-79_28 | -1.95 | 0.01 | -1.95 | 0.01 | 0.00024 | 0.00001 | 0.000018 | 0.00000 | 0.283170 | 0.000027 |
| 713-79_29 | -1.89 | 0.00 | -1.89 | 0.00 | 0.00017 | 0.00001 | 0.000012 | 0.00000 | 0.283011 | 0.000019 |

**Mean [±2SD]**

**0.283182[145]**

81

82

83 Table S8

84 Hf isotopes of CGM and ferrotapiolite samples by LA-MC-ICP-MS ( $^{178}\text{Hf}/^{177}\text{Hf}$  normalization).

|                                                             | beta 2/3Yb | 2SE  | beta 7/8Hf | 2SE  | $^{176}\text{Yb}/^{177}\text{Hf}$ | 2SE      | $^{176}\text{Lu}/^{177}\text{Hf}$ | 2SE      | $^{176}\text{Hf}/^{177}\text{Hf}$ | 2SE      |
|-------------------------------------------------------------|------------|------|------------|------|-----------------------------------|----------|-----------------------------------|----------|-----------------------------------|----------|
| <b><i>NP-2 (120<math>\mu\text{m}20\text{Hz}</math>)</i></b> |            |      |            |      |                                   |          |                                   |          |                                   |          |
| NP-2_01                                                     | -2.63      | 0.57 | -1.79      | 0.01 | 0.006025                          | 0.000013 | 0.000250                          | 0.000001 | 0.282204                          | 0.000033 |
| NP-2_02                                                     | -2.88      | 0.55 | -1.77      | 0.01 | 0.005983                          | 0.000019 | 0.000247                          | 0.000001 | 0.282152                          | 0.000030 |
| NP-2_03                                                     | -2.49      | 0.52 | -1.77      | 0.01 | 0.006158                          | 0.000047 | 0.000256                          | 0.000002 | 0.282216                          | 0.000028 |
| NP-2_04                                                     | -3.00      | 0.71 | -1.78      | 0.01 | 0.006061                          | 0.000018 | 0.000251                          | 0.000001 | 0.282146                          | 0.000035 |
| NP-2_05                                                     | -3.30      | 0.62 | -1.77      | 0.01 | 0.006034                          | 0.000019 | 0.000249                          | 0.000001 | 0.282097                          | 0.000032 |
| NP-2_06                                                     | -2.28      | 0.47 | -1.75      | 0.01 | 0.006464                          | 0.000050 | 0.000269                          | 0.000002 | 0.282169                          | 0.000028 |
| NP-2_07                                                     | -2.23      | 0.54 | -1.80      | 0.02 | 0.006134                          | 0.000028 | 0.000257                          | 0.000001 | 0.282266                          | 0.000033 |
| NP-2_08                                                     | -2.50      | 0.54 | -1.77      | 0.01 | 0.006736                          | 0.000116 | 0.000274                          | 0.000004 | 0.282177                          | 0.000030 |
| NP-2_09                                                     | -1.97      | 0.51 | -1.78      | 0.01 | 0.005940                          | 0.000011 | 0.000249                          | 0.000001 | 0.282257                          | 0.000031 |
| NP-2_10                                                     | -2.83      | 0.65 | -1.78      | 0.01 | 0.006415                          | 0.000027 | 0.000266                          | 0.000001 | 0.282183                          | 0.000038 |
| NP-2_11                                                     | -2.45      | 0.55 | -1.77      | 0.01 | 0.005739                          | 0.000079 | 0.000238                          | 0.000003 | 0.282206                          | 0.000030 |
| NP-2_12                                                     | -2.62      | 0.48 | -1.77      | 0.01 | 0.005970                          | 0.000012 | 0.000247                          | 0.000001 | 0.282143                          | 0.000032 |
| NP-2_13                                                     | -1.97      | 0.79 | -1.78      | 0.01 | 0.006149                          | 0.000068 | 0.000257                          | 0.000002 | 0.282277                          | 0.000045 |
| NP-2_14                                                     | -2.86      | 0.56 | -1.79      | 0.01 | 0.005706                          | 0.000011 | 0.000237                          | 0.000000 | 0.282165                          | 0.000029 |
| NP-2_15                                                     | -2.89      | 0.62 | -1.77      | 0.01 | 0.005827                          | 0.000022 | 0.000241                          | 0.000001 | 0.282177                          | 0.000031 |
| NP-2_16                                                     | -3.01      | 0.68 | -1.76      | 0.01 | 0.006019                          | 0.000013 | 0.000247                          | 0.000001 | 0.282086                          | 0.000031 |
| NP-2_17                                                     | -2.87      | 0.64 | -1.76      | 0.01 | 0.005833                          | 0.000013 | 0.000242                          | 0.000001 | 0.282121                          | 0.000032 |
| NP-2_18                                                     | -2.59      | 0.66 | -1.81      | 0.02 | 0.005649                          | 0.000025 | 0.000236                          | 0.000001 | 0.282279                          | 0.000036 |
| NP-2_19                                                     | -2.34      | 0.50 | -1.76      | 0.01 | 0.005768                          | 0.000055 | 0.000241                          | 0.000002 | 0.282167                          | 0.000030 |
| NP-2_20                                                     | -2.82      | 0.60 | -1.77      | 0.01 | 0.005908                          | 0.000015 | 0.000244                          | 0.000001 | 0.282170                          | 0.000030 |
| NP-2_21                                                     | -2.97      | 0.67 | -1.77      | 0.01 | 0.005920                          | 0.000015 | 0.000246                          | 0.000001 | 0.282124                          | 0.000038 |
| <b>Mean [<math>\pm 2\text{SD}</math>]</b>                   |            |      |            |      |                                   |          |                                   |          | <b>0.282180[111]</b>              |          |
| <b><i>U-1 (120<math>\mu\text{m}20\text{Hz}</math>)</i></b>  |            |      |            |      |                                   |          |                                   |          |                                   |          |
| U-1_01                                                      | -10.40     | 3.38 | -1.90      | 0.01 | 0.001216                          | 0.000014 | 0.000033                          | 0.000000 | 0.281945                          | 0.000027 |

|        |        |      |       |      |          |          |          |          |          |          |
|--------|--------|------|-------|------|----------|----------|----------|----------|----------|----------|
| U-1_02 | -12.68 | 2.76 | -1.91 | 0.01 | 0.001326 | 0.000013 | 0.000034 | 0.000001 | 0.281854 | 0.000032 |
| U-1_03 | -11.38 | 2.74 | -1.90 | 0.01 | 0.001337 | 0.000015 | 0.000035 | 0.000000 | 0.281875 | 0.000034 |
| U-1_04 | -8.45  | 2.92 | -1.89 | 0.01 | 0.001222 | 0.000013 | 0.000034 | 0.000001 | 0.281944 | 0.000029 |
| U-1_05 | -5.34  | 5.65 | -1.93 | 0.03 | 0.001154 | 0.000014 | 0.000033 | 0.000000 | 0.282080 | 0.000031 |
| U-1_06 | -10.10 | 2.80 | -1.88 | 0.01 | 0.001297 | 0.000014 | 0.000035 | 0.000001 | 0.281896 | 0.000029 |
| U-1_07 | -9.59  | 2.96 | -1.89 | 0.01 | 0.001377 | 0.000018 | 0.000038 | 0.000001 | 0.281896 | 0.000031 |
| U-1_08 | -8.69  | 3.09 | -1.92 | 0.02 | 0.001205 | 0.000012 | 0.000033 | 0.000001 | 0.281989 | 0.000030 |
| U-1_09 | -9.00  | 3.97 | -1.94 | 0.02 | 0.001646 | 0.000022 | 0.000045 | 0.000001 | 0.282067 | 0.000048 |
| U-1_10 | -9.11  | 2.74 | -1.90 | 0.02 | 0.001325 | 0.000014 | 0.000037 | 0.000001 | 0.281943 | 0.000034 |
| U-1_11 | -14.75 | 3.53 | -1.93 | 0.01 | 0.001309 | 0.000017 | 0.000034 | 0.000001 | 0.281887 | 0.000034 |
| U-1_12 | -16.14 | 5.67 | -2.01 | 0.02 | 0.001628 | 0.000033 | 0.000044 | 0.000001 | 0.282021 | 0.000063 |
| U-1_13 | -9.66  | 4.56 | -1.92 | 0.01 | 0.001092 | 0.000017 | 0.000032 | 0.000001 | 0.282022 | 0.000032 |
| U-1_14 | -18.49 | 6.49 | -2.02 | 0.02 | 0.001941 | 0.000047 | 0.000051 | 0.000001 | 0.281993 | 0.000075 |
| U-1_15 | -9.67  | 3.47 | -1.91 | 0.01 | 0.001255 | 0.000015 | 0.000035 | 0.000001 | 0.281970 | 0.000034 |
| U-1_16 | -9.21  | 2.68 | -1.92 | 0.02 | 0.001622 | 0.000026 | 0.000045 | 0.000001 | 0.281931 | 0.000037 |
| U-1_17 | -9.36  | 2.53 | -1.88 | 0.01 | 0.001229 | 0.000011 | 0.000034 | 0.000000 | 0.281884 | 0.000029 |
| U-1_18 | -11.77 | 2.74 | -1.88 | 0.02 | 0.001286 | 0.000012 | 0.000035 | 0.000000 | 0.281795 | 0.000031 |
| U-1_19 | -12.43 | 4.39 | -1.97 | 0.02 | 0.002052 | 0.000032 | 0.000059 | 0.000001 | 0.282020 | 0.000060 |
| U-1_20 | -11.98 | 5.64 | -1.90 | 0.02 | 0.001279 | 0.000021 | 0.000035 | 0.000001 | 0.281914 | 0.000047 |
| U-1_21 | -12.03 | 4.14 | -1.87 | 0.01 | 0.001102 | 0.000016 | 0.000031 | 0.000001 | 0.281865 | 0.000031 |
| U-1_22 | -11.13 | 3.24 | -1.89 | 0.02 | 0.001198 | 0.000012 | 0.000033 | 0.000001 | 0.281910 | 0.000032 |
| U-1_23 | -9.78  | 3.12 | -1.90 | 0.02 | 0.001283 | 0.000016 | 0.000036 | 0.000001 | 0.281926 | 0.000038 |
| U-1_24 | -12.10 | 3.29 | -1.89 | 0.02 | 0.001144 | 0.000013 | 0.000031 | 0.000000 | 0.281884 | 0.000031 |
| U-1_25 | -15.73 | 3.93 | -1.88 | 0.02 | 0.001166 | 0.000017 | 0.000031 | 0.000001 | 0.281738 | 0.000034 |
| U-1_26 | -10.41 | 2.88 | -1.89 | 0.02 | 0.001481 | 0.000016 | 0.000040 | 0.000001 | 0.281810 | 0.000039 |
| U-1_27 | -11.28 | 3.20 | -1.87 | 0.01 | 0.001180 | 0.000012 | 0.000032 | 0.000001 | 0.281834 | 0.000031 |
| U-1_28 | -13.99 | 3.86 | -1.90 | 0.01 | 0.001257 | 0.000018 | 0.000033 | 0.000001 | 0.281882 | 0.000034 |
| U-1_29 | -9.57  | 3.68 | -1.91 | 0.02 | 0.001249 | 0.000018 | 0.000035 | 0.000001 | 0.281957 | 0.000037 |

Mean [ $\pm 2SD$ ]

0.281922[159]

*U-3 (120 $\mu$ m20Hz)*

|        |       |      |       |      |          |          |          |          |          |          |
|--------|-------|------|-------|------|----------|----------|----------|----------|----------|----------|
| U-3_01 | -1.79 | 0.01 | -1.79 | 0.01 | 0.000024 | 0.000005 | 0.000002 | 0.000000 | 0.281780 | 0.000018 |
| U-3_02 | -1.79 | 0.01 | -1.79 | 0.01 | 0.000024 | 0.000004 | 0.000002 | 0.000000 | 0.281797 | 0.000015 |
| U-3_03 | -1.78 | 0.01 | -1.78 | 0.01 | 0.000018 | 0.000004 | 0.000002 | 0.000000 | 0.281782 | 0.000015 |
| U-3_04 | -1.78 | 0.01 | -1.78 | 0.01 | 0.000019 | 0.000004 | 0.000002 | 0.000000 | 0.281750 | 0.000015 |
| U-3_05 | -1.79 | 0.01 | -1.79 | 0.01 | 0.000018 | 0.000004 | 0.000002 | 0.000000 | 0.281767 | 0.000014 |
| U-3_06 | -1.79 | 0.01 | -1.79 | 0.01 | 0.000063 | 0.000004 | 0.000004 | 0.000000 | 0.281746 | 0.000014 |
| U-3_07 | -1.78 | 0.01 | -1.78 | 0.01 | 0.000520 | 0.000029 | 0.000025 | 0.000001 | 0.281758 | 0.000016 |
| U-3_08 | -1.76 | 0.01 | -1.76 | 0.01 | 0.000090 | 0.000007 | 0.000004 | 0.000000 | 0.281722 | 0.000016 |
| U-3_09 | -1.75 | 0.01 | -1.75 | 0.01 | 0.000067 | 0.000007 | 0.000003 | 0.000000 | 0.281732 | 0.000016 |
| U-3_10 | -1.76 | 0.01 | -1.76 | 0.01 | 0.000015 | 0.000004 | 0.000002 | 0.000000 | 0.281755 | 0.000015 |
| U-3_11 | -1.76 | 0.01 | -1.76 | 0.01 | 0.000018 | 0.000004 | 0.000002 | 0.000000 | 0.281757 | 0.000016 |
| U-3_12 | -1.76 | 0.01 | -1.76 | 0.01 | 0.000020 | 0.000004 | 0.000002 | 0.000000 | 0.281748 | 0.000016 |
| U-3_13 | -1.76 | 0.01 | -1.76 | 0.01 | 0.000090 | 0.000004 | 0.000004 | 0.000000 | 0.281744 | 0.000016 |
| U-3_14 | -1.75 | 0.01 | -1.75 | 0.01 | 0.000021 | 0.000005 | 0.000002 | 0.000000 | 0.281732 | 0.000015 |
| U-3_15 | -1.75 | 0.01 | -1.75 | 0.01 | 0.000067 | 0.000005 | 0.000004 | 0.000000 | 0.281731 | 0.000016 |
| U-3_16 | -1.76 | 0.01 | -1.76 | 0.01 | 0.000031 | 0.000004 | 0.000002 | 0.000000 | 0.281736 | 0.000015 |
| U-3_17 | -1.76 | 0.01 | -1.76 | 0.01 | 0.000017 | 0.000004 | 0.000002 | 0.000000 | 0.281738 | 0.000016 |
| U-3_18 | -1.74 | 0.01 | -1.74 | 0.01 | 0.000018 | 0.000004 | 0.000002 | 0.000000 | 0.281731 | 0.000015 |
| U-3_19 | -1.75 | 0.01 | -1.75 | 0.01 | 0.000065 | 0.000004 | 0.000004 | 0.000000 | 0.281710 | 0.000015 |
| U-3_20 | -1.75 | 0.01 | -1.75 | 0.01 | 0.000021 | 0.000004 | 0.000002 | 0.000000 | 0.281741 | 0.000016 |
| U-3_21 | -1.76 | 0.01 | -1.76 | 0.01 | 0.003256 | 0.000172 | 0.000120 | 0.000006 | 0.281748 | 0.000016 |
| U-3_22 | -1.76 | 0.01 | -1.76 | 0.01 | 0.000873 | 0.000084 | 0.000035 | 0.000003 | 0.281756 | 0.000018 |

Mean [ $\pm 2SD$ ]

0.281748[41]

*Coltan139 (160 $\mu$ m20Hz)*

|              |       |      |       |      |          |          |          |          |          |          |
|--------------|-------|------|-------|------|----------|----------|----------|----------|----------|----------|
| Coltan139_01 | -1.51 | 0.02 | -1.76 | 0.01 | 0.133207 | 0.000032 | 0.003366 | 0.000001 | 0.282006 | 0.000021 |
| Coltan139_02 | -1.50 | 0.02 | -1.75 | 0.01 | 0.133003 | 0.000054 | 0.003369 | 0.000001 | 0.282020 | 0.000022 |

|                                          |       |      |       |      |          |          |          |          |                     |          |
|------------------------------------------|-------|------|-------|------|----------|----------|----------|----------|---------------------|----------|
| Coltan139_03                             | -1.52 | 0.02 | -1.74 | 0.01 | 0.133638 | 0.000080 | 0.003377 | 0.000002 | 0.281915            | 0.000022 |
| Coltan139_04                             | -1.54 | 0.02 | -1.75 | 0.01 | 0.134150 | 0.000057 | 0.003384 | 0.000001 | 0.281891            | 0.000023 |
| Coltan139_05                             | -1.52 | 0.02 | -1.75 | 0.01 | 0.133993 | 0.000038 | 0.003376 | 0.000001 | 0.281942            | 0.000021 |
| Coltan139_06                             | -1.53 | 0.02 | -1.76 | 0.01 | 0.134002 | 0.000044 | 0.003383 | 0.000001 | 0.281928            | 0.000024 |
| Coltan139_07                             | -1.51 | 0.02 | -1.74 | 0.01 | 0.134628 | 0.000033 | 0.003384 | 0.000001 | 0.281962            | 0.000023 |
| Coltan139_08                             | -1.52 | 0.02 | -1.75 | 0.01 | 0.135477 | 0.000045 | 0.003403 | 0.000001 | 0.281920            | 0.000020 |
| Coltan139_09                             | -1.52 | 0.02 | -1.76 | 0.01 | 0.138112 | 0.000036 | 0.003469 | 0.000001 | 0.282004            | 0.000022 |
| Coltan139_10                             | -1.53 | 0.02 | -1.74 | 0.01 | 0.140027 | 0.000037 | 0.003511 | 0.000001 | 0.281921            | 0.000020 |
| Coltan139_11                             | -1.51 | 0.02 | -1.75 | 0.01 | 0.134025 | 0.000042 | 0.003395 | 0.000001 | 0.281983            | 0.000023 |
| Coltan139_12                             | -1.51 | 0.02 | -1.75 | 0.01 | 0.134845 | 0.000032 | 0.003418 | 0.000001 | 0.281971            | 0.000024 |
| Coltan139_13                             | -1.51 | 0.02 | -1.75 | 0.01 | 0.135701 | 0.000082 | 0.003442 | 0.000003 | 0.282043            | 0.000024 |
| Coltan139_14                             | -1.51 | 0.02 | -1.75 | 0.01 | 0.134345 | 0.000028 | 0.003409 | 0.000001 | 0.281996            | 0.000023 |
| Coltan139_15                             | -1.50 | 0.02 | -1.76 | 0.01 | 0.135211 | 0.000033 | 0.003435 | 0.000001 | 0.282057            | 0.000023 |
| Coltan139_16                             | -1.54 | 0.02 | -1.76 | 0.01 | 0.133534 | 0.000047 | 0.003378 | 0.000001 | 0.281889            | 0.000022 |
| Coltan139_17                             | -1.52 | 0.02 | -1.76 | 0.01 | 0.134251 | 0.000056 | 0.003397 | 0.000001 | 0.281962            | 0.000023 |
| Coltan139_18                             | -1.52 | 0.02 | -1.76 | 0.01 | 0.135511 | 0.000052 | 0.003424 | 0.000001 | 0.281968            | 0.000021 |
| Coltan139_19                             | -1.51 | 0.02 | -1.75 | 0.01 | 0.136330 | 0.000208 | 0.003463 | 0.000007 | 0.282008            | 0.000024 |
| Coltan139_20                             | -1.51 | 0.02 | -1.75 | 0.01 | 0.134935 | 0.000046 | 0.003419 | 0.000001 | 0.282018            | 0.000023 |
| <b>Mean [<math>\pm 2SD</math>]</b>       |       |      |       |      |          |          |          |          | <b>0.281970[98]</b> |          |
| <hr/>                                    |       |      |       |      |          |          |          |          |                     |          |
| <b>713-79 (160<math>\mu</math>m20Hz)</b> |       |      |       |      |          |          |          |          |                     |          |
| 713-79_01                                | -1.77 | 0.01 | -1.77 | 0.01 | 0.000166 | 0.000006 | 0.000012 | 0.000000 | 0.282858            | 0.000019 |
| 713-79_02                                | -1.78 | 0.01 | -1.78 | 0.01 | 0.000213 | 0.000012 | 0.000015 | 0.000001 | 0.282945            | 0.000030 |
| 713-79_03                                | -1.77 | 0.01 | -1.77 | 0.01 | 0.000294 | 0.000012 | 0.000019 | 0.000000 | 0.282871            | 0.000027 |
| 713-79_04                                | -1.77 | 0.01 | -1.77 | 0.01 | 0.000187 | 0.000012 | 0.000013 | 0.000000 | 0.282929            | 0.000033 |
| 713-79_05                                | -1.77 | 0.01 | -1.77 | 0.01 | 0.000248 | 0.000009 | 0.000018 | 0.000000 | 0.282918            | 0.000026 |
| 713-79_06                                | -1.79 | 0.01 | -1.79 | 0.01 | 0.000402 | 0.000017 | 0.000023 | 0.000001 | 0.282977            | 0.000037 |
| 713-79_07                                | -1.77 | 0.01 | -1.77 | 0.01 | 0.000633 | 0.000016 | 0.000027 | 0.000001 | 0.282920            | 0.000031 |
| 713-79_08                                | -1.76 | 0.01 | -1.76 | 0.01 | 0.000522 | 0.000079 | 0.000027 | 0.000003 | 0.282846            | 0.000030 |

|           |       |      |       |      |          |          |          |          |          |          |
|-----------|-------|------|-------|------|----------|----------|----------|----------|----------|----------|
| 713-79_09 | -1.78 | 0.01 | -1.78 | 0.01 | 0.000358 | 0.000014 | 0.000019 | 0.000001 | 0.282892 | 0.000031 |
| 713-79_10 | -1.79 | 0.01 | -1.79 | 0.01 | 0.002848 | 0.000242 | 0.000105 | 0.000007 | 0.282928 | 0.000034 |
| 713-79_11 | -1.78 | 0.01 | -1.78 | 0.01 | 0.000582 | 0.000016 | 0.000038 | 0.000001 | 0.282947 | 0.000042 |
| 713-79_12 | -1.77 | 0.01 | -1.77 | 0.01 | 0.000208 | 0.000009 | 0.000015 | 0.000000 | 0.282880 | 0.000021 |
| 713-79_13 | -1.77 | 0.01 | -1.77 | 0.01 | 0.000242 | 0.000012 | 0.000015 | 0.000001 | 0.282938 | 0.000027 |
| 713-79_14 | -1.77 | 0.01 | -1.77 | 0.01 | 0.000249 | 0.000010 | 0.000017 | 0.000000 | 0.282923 | 0.000030 |
| 713-79_15 | -1.78 | 0.01 | -1.78 | 0.01 | 0.000232 | 0.000010 | 0.000016 | 0.000000 | 0.282907 | 0.000028 |
| 713-79_16 | -1.77 | 0.01 | -1.77 | 0.01 | 0.000222 | 0.000010 | 0.000016 | 0.000000 | 0.282911 | 0.000029 |
| 713-79_17 | -1.78 | 0.01 | -1.78 | 0.01 | 0.000234 | 0.000010 | 0.000016 | 0.000000 | 0.282891 | 0.000029 |
| 713-79_18 | -1.77 | 0.01 | -1.77 | 0.01 | 0.000246 | 0.000010 | 0.000017 | 0.000000 | 0.282901 | 0.000025 |
| 713-79_19 | -1.77 | 0.01 | -1.77 | 0.01 | 0.000238 | 0.000010 | 0.000017 | 0.000000 | 0.282910 | 0.000026 |
| 713-79_20 | -1.78 | 0.01 | -1.78 | 0.01 | 0.000225 | 0.000010 | 0.000016 | 0.000000 | 0.282909 | 0.000029 |
| 713-79_21 | -1.76 | 0.01 | -1.76 | 0.01 | 0.000201 | 0.000009 | 0.000015 | 0.000000 | 0.282869 | 0.000029 |
| 713-79_22 | -1.79 | 0.01 | -1.79 | 0.01 | 0.000235 | 0.000009 | 0.000017 | 0.000000 | 0.282909 | 0.000024 |
| 713-79_23 | -1.78 | 0.01 | -1.78 | 0.01 | 0.000248 | 0.000010 | 0.000017 | 0.000000 | 0.282892 | 0.000027 |
| 713-79_24 | -1.78 | 0.01 | -1.78 | 0.01 | 0.000194 | 0.000010 | 0.000014 | 0.000000 | 0.282920 | 0.000024 |
| 713-79_25 | -1.77 | 0.01 | -1.77 | 0.01 | 0.000180 | 0.000010 | 0.000013 | 0.000000 | 0.282860 | 0.000031 |
| 713-79_26 | -1.79 | 0.01 | -1.79 | 0.01 | 0.000180 | 0.000012 | 0.000013 | 0.000000 | 0.282948 | 0.000030 |
| 713-79_27 | -1.76 | 0.01 | -1.76 | 0.01 | 0.000247 | 0.000009 | 0.000016 | 0.000000 | 0.282865 | 0.000026 |
| 713-79_28 | -1.78 | 0.01 | -1.78 | 0.01 | 0.000239 | 0.000010 | 0.000018 | 0.000000 | 0.282889 | 0.000027 |
| 713-79_29 | -1.77 | 0.01 | -1.77 | 0.01 | 0.000172 | 0.000007 | 0.000012 | 0.000000 | 0.282819 | 0.000019 |

**Mean [ $\pm 2SD$ ]**

**0.282903[70]**

86 Table S9

87 CGM and ferrotapiolite Hf isotopic analytical results by (LA)-MC-ICP-MS.

|                        | t(Ma) | $^{176}\text{Yb}/^{177}\text{Hf}$ | $^{176}\text{Lu}/^{177}\text{Hf}$ | 2SE | $^{176}\text{Hf}/^{177}\text{Hf}$ | 2SE      | $^{176}\text{Hf}/^{177}\text{Hf}_i$ | $\epsilon_{\text{Hf}(0)}$ | $\epsilon_{\text{Hf}(t)}$ | 2SE | $T_{\text{MD}}(\text{Ma})$ | TC<br>(Ma) | DM | 2SE   | $f_{\text{Lu/Hf}}$ |
|------------------------|-------|-----------------------------------|-----------------------------------|-----|-----------------------------------|----------|-------------------------------------|---------------------------|---------------------------|-----|----------------------------|------------|----|-------|--------------------|
| <b><i>Solution</i></b> |       |                                   |                                   |     |                                   |          |                                     |                           |                           |     |                            |            |    |       |                    |
| <b>NP-2</b>            |       |                                   |                                   |     |                                   |          |                                     |                           |                           |     |                            |            |    |       |                    |
| NP-2-1                 | 387   |                                   | 0.000178                          |     | 0.282151                          | 0.000037 | 0.282150                            | -21.9                     | -13.5                     | 1.3 | 1518                       | 2226       | 83 | -0.99 |                    |
| NP-2-2                 | 387   |                                   | 0.000223                          |     | 0.282190                          | 0.000018 | 0.282188                            | -20.6                     | -12.1                     | 0.6 | 1467                       | 2141       | 39 | -0.99 |                    |
| NP-2-3                 | 387   |                                   | 0.000152                          |     | 0.282168                          | 0.000024 | 0.282167                            | -21.3                     | -12.9                     | 0.9 | 1494                       | 2188       | 54 | -1.00 |                    |
| NP-2-4                 | 387   |                                   | 0.000182                          |     | 0.282164                          | 0.000021 | 0.282163                            | -21.5                     | -13.0                     | 0.7 | 1500                       | 2197       | 46 | -0.99 |                    |
| <b>U-1</b>             |       |                                   |                                   |     |                                   |          |                                     |                           |                           |     |                            |            |    |       |                    |
| U-1-2                  | 971   |                                   | 0.000011                          |     | 0.281862                          | 0.000026 | 0.281862                            | -32.2                     | -10.7                     | 0.9 | 1902                       | 2492       | 57 | -1.00 |                    |
| U-1-3                  | 971   |                                   | 0.000025                          |     | 0.281824                          | 0.000044 | 0.281824                            | -33.5                     | -12.1                     | 1.6 | 1954                       | 2575       | 98 | -1.00 |                    |
| U-1-4                  | 971   |                                   | 0.000008                          |     | 0.281848                          | 0.000020 | 0.281848                            | -32.7                     | -11.2                     | 0.8 | 1921                       | 2522       | 45 | -1.00 |                    |
| <b>U-3</b>             |       |                                   |                                   |     |                                   |          |                                     |                           |                           |     |                            |            |    |       |                    |
| U-3-1                  | 966   |                                   | 0.000013                          |     | 0.281712                          | 0.000007 | 0.281712                            | -37.5                     | -16.1                     | 0.4 | 2104                       | 2824       | 16 | -1.00 |                    |
| U-3-2                  | 966   |                                   | 0.000010                          |     | 0.281717                          | 0.000007 | 0.281717                            | -37.3                     | -16.0                     | 0.4 | 2098                       | 2814       | 17 | -1.00 |                    |
|                        |       |                                   | 0.000006                          |     | 0.281691                          | 0.000011 | 0.281691                            | -38.2                     | -16.9                     | 0.5 | 2132                       | 2871       | 26 | -1.00 |                    |
| U-3-3                  | 966   |                                   | 0.000008                          |     | 0.281693                          | 0.000010 | 0.281693                            | -38.2                     | -16.8                     | 0.5 | 2130                       | 2867       | 24 | -1.00 |                    |
| <b>Coltan139</b>       |       |                                   |                                   |     |                                   |          |                                     |                           |                           |     |                            |            |    |       |                    |
| Coltan139-1            | 505   |                                   | 0.003495                          |     | 0.281992                          | 0.000012 | 0.281959                            | -27.6                     | -17.6                     | 0.4 | 1896                       | 2571       | 27 | -0.89 |                    |
| Coltan139-2            | 505   |                                   | 0.003596                          |     | 0.281991                          | 0.000010 | 0.281957                            | -27.6                     | -17.7                     | 0.4 | 1904                       | 2577       | 22 | -0.89 |                    |
| Coltan139-3            | 505   |                                   | 0.003663                          |     | 0.281990                          | 0.000010 | 0.281955                            | -27.7                     | -17.8                     | 0.4 | 1909                       | 2581       | 23 | -0.89 |                    |
| <b>713-79</b>          |       |                                   |                                   |     |                                   |          |                                     |                           |                           |     |                            |            |    |       |                    |
| 713-79-1               | 218   |                                   | 0.000010                          |     | 0.282762                          | 0.000008 | 0.282762                            | -0.4                      | 4.4                       | 0.3 | 677                        | 968        | 18 | -1.00 |                    |
| 713-79-2               | 218   |                                   | 0.000032                          |     | 0.282740                          | 0.000010 | 0.282740                            | -1.1                      | 3.7                       | 0.4 | 707                        | 1016       | 22 | -1.00 |                    |
|                        |       |                                   | 0.000026                          |     | 0.282743                          | 0.000011 | 0.282742                            | -1.0                      | 3.7                       | 0.4 | 704                        | 1011       | 24 | -1.00 |                    |
| 713-79-3               | 218   |                                   | 0.000011                          |     | 0.282765                          | 0.000005 | 0.282765                            | -0.3                      | 4.5                       | 0.2 | 673                        | 961        | 11 | -1.00 |                    |



|             | 218 |          | 0.000008 |          | 0.282733 | 0.000006 | 0.282733 | -1.4  | 3.4   | 0.2 | 716  | 1032 | 14 | -1.00 |
|-------------|-----|----------|----------|----------|----------|----------|----------|-------|-------|-----|------|------|----|-------|
| <b>LA</b>   |     |          |          |          |          |          |          |       |       |     |      |      |    |       |
| <b>NP-2</b> |     |          |          |          |          |          |          |       |       |     |      |      |    |       |
| NP-2_01     | 387 | 0.006025 | 0.000250 | 0.000001 | 0.282204 | 0.000033 | 0.282203 | -20.1 | -11.6 | 1.2 | 1448 | 2109 | 73 | -0.99 |
| NP-2_02     | 387 | 0.005983 | 0.000247 | 0.000001 | 0.282152 | 0.000030 | 0.282150 | -21.9 | -13.5 | 1.1 | 1520 | 2226 | 67 | -0.99 |
| NP-2_03     | 387 | 0.006158 | 0.000256 | 0.000002 | 0.282216 | 0.000028 | 0.282214 | -19.7 | -11.2 | 1.0 | 1433 | 2084 | 62 | -0.99 |
| NP-2_04     | 387 | 0.006061 | 0.000251 | 0.000001 | 0.282146 | 0.000035 | 0.282144 | -22.1 | -13.7 | 1.2 | 1528 | 2239 | 77 | -0.99 |
| NP-2_05     | 387 | 0.006034 | 0.000249 | 0.000001 | 0.282097 | 0.000032 | 0.282095 | -23.9 | -15.4 | 1.1 | 1595 | 2348 | 70 | -0.99 |
| NP-2_06     | 387 | 0.006464 | 0.000269 | 0.000002 | 0.282169 | 0.000028 | 0.282167 | -21.3 | -12.9 | 1.0 | 1497 | 2189 | 62 | -0.99 |
| NP-2_07     | 387 | 0.006134 | 0.000257 | 0.000001 | 0.282266 | 0.000033 | 0.282264 | -17.9 | -9.5  | 1.2 | 1365 | 1974 | 73 | -0.99 |
| NP-2_08     | 387 | 0.006736 | 0.000274 | 0.000004 | 0.282177 | 0.000030 | 0.282175 | -21.1 | -12.6 | 1.1 | 1487 | 2172 | 67 | -0.99 |
| NP-2_09     | 387 | 0.005940 | 0.000249 | 0.000001 | 0.282257 | 0.000031 | 0.282255 | -18.2 | -9.8  | 1.1 | 1377 | 1993 | 68 | -0.99 |
| NP-2_10     | 387 | 0.006415 | 0.000266 | 0.000001 | 0.282183 | 0.000038 | 0.282181 | -20.8 | -12.4 | 1.4 | 1478 | 2157 | 85 | -0.99 |
| NP-2_11     | 387 | 0.005739 | 0.000238 | 0.000003 | 0.282206 | 0.000030 | 0.282205 | -20.0 | -11.6 | 1.1 | 1445 | 2105 | 68 | -0.99 |
| NP-2_12     | 387 | 0.005970 | 0.000247 | 0.000001 | 0.282143 | 0.000032 | 0.282141 | -22.3 | -13.8 | 1.1 | 1533 | 2246 | 70 | -0.99 |
| NP-2_13     | 387 | 0.006149 | 0.000257 | 0.000002 | 0.282277 | 0.000045 | 0.282275 | -17.5 | -9.1  | 1.6 | 1350 | 1950 | 99 | -0.99 |
| NP-2_14     | 387 | 0.005706 | 0.000237 | 0.000000 | 0.282165 | 0.000029 | 0.282163 | -21.5 | -13.0 | 1.0 | 1501 | 2197 | 64 | -0.99 |
| NP-2_15     | 387 | 0.005827 | 0.000241 | 0.000001 | 0.282177 | 0.000031 | 0.282176 | -21.0 | -12.6 | 1.1 | 1485 | 2169 | 68 | -0.99 |
| NP-2_16     | 387 | 0.006019 | 0.000247 | 0.000001 | 0.282086 | 0.000031 | 0.282084 | -24.3 | -15.8 | 1.1 | 1610 | 2372 | 68 | -0.99 |
| NP-2_17     | 387 | 0.005833 | 0.000242 | 0.000001 | 0.282121 | 0.000032 | 0.282120 | -23.0 | -14.6 | 1.1 | 1561 | 2293 | 72 | -0.99 |
| NP-2_18     | 387 | 0.005649 | 0.000236 | 0.000001 | 0.282279 | 0.000036 | 0.282278 | -17.4 | -9.0  | 1.3 | 1345 | 1943 | 79 | -0.99 |
| NP-2_19     | 387 | 0.005768 | 0.000241 | 0.000002 | 0.282167 | 0.000030 | 0.282165 | -21.4 | -13.0 | 1.1 | 1499 | 2192 | 66 | -0.99 |
| NP-2_20     | 387 | 0.005908 | 0.000244 | 0.000001 | 0.282170 | 0.000030 | 0.282168 | -21.3 | -12.8 | 1.1 | 1495 | 2185 | 66 | -0.99 |
| NP-2_21     | 387 | 0.005920 | 0.000246 | 0.000001 | 0.282124 | 0.000038 | 0.282123 | -22.9 | -14.5 | 1.4 | 1557 | 2287 | 85 | -0.99 |
| <b>U-1</b>  |     |          |          |          |          |          |          |       |       |     |      |      |    |       |
| U-1_01      | 971 | 0.001216 | 0.000033 | 0.000000 | 0.281945 | 0.000027 | 0.281945 | -29.2 | -7.8  | 1.0 | 1791 | 2309 | 61 | -1.00 |
| U-1_02      | 971 | 0.001326 | 0.000034 | 0.000001 | 0.281854 | 0.000032 | 0.281854 | -32.5 | -11.0 | 1.2 | 1914 | 2510 | 72 | -1.00 |
| U-1_03      | 971 | 0.001337 | 0.000035 | 0.000000 | 0.281875 | 0.000034 | 0.281874 | -31.7 | -10.3 | 1.2 | 1886 | 2465 | 74 | -1.00 |

|            |     |          |          |          |          |          |          |       |       |     |      |      |     |       |
|------------|-----|----------|----------|----------|----------|----------|----------|-------|-------|-----|------|------|-----|-------|
| U-1_04     | 971 | 0.001222 | 0.000034 | 0.000001 | 0.281944 | 0.000029 | 0.281943 | -29.3 | -7.8  | 1.1 | 1793 | 2313 | 64  | -1.00 |
| U-1_05     | 971 | 0.001154 | 0.000033 | 0.000000 | 0.282080 | 0.000031 | 0.282079 | -24.5 | -3.0  | 1.1 | 1610 | 2013 | 70  | -1.00 |
| U-1_06     | 971 | 0.001297 | 0.000035 | 0.000001 | 0.281896 | 0.000029 | 0.281895 | -31.0 | -9.5  | 1.1 | 1858 | 2418 | 64  | -1.00 |
| U-1_07     | 971 | 0.001377 | 0.000038 | 0.000001 | 0.281896 | 0.000031 | 0.281895 | -31.0 | -9.5  | 1.1 | 1858 | 2419 | 70  | -1.00 |
| U-1_08     | 971 | 0.001205 | 0.000033 | 0.000001 | 0.281989 | 0.000030 | 0.281989 | -27.7 | -6.2  | 1.1 | 1732 | 2213 | 68  | -1.00 |
| U-1_09     | 971 | 0.001646 | 0.000045 | 0.000001 | 0.282067 | 0.000048 | 0.282067 | -24.9 | -3.5  | 1.7 | 1627 | 2041 | 107 | -1.00 |
| U-1_10     | 971 | 0.001325 | 0.000037 | 0.000001 | 0.281943 | 0.000034 | 0.281942 | -29.3 | -7.9  | 1.2 | 1795 | 2316 | 76  | -1.00 |
| U-1_11     | 971 | 0.001309 | 0.000034 | 0.000001 | 0.281887 | 0.000034 | 0.281887 | -31.3 | -9.8  | 1.2 | 1869 | 2437 | 76  | -1.00 |
| U-1_12     | 971 | 0.001628 | 0.000044 | 0.000001 | 0.282021 | 0.000063 | 0.282020 | -26.5 | -5.1  | 2.3 | 1689 | 2143 | 140 | -1.00 |
| U-1_13     | 971 | 0.001092 | 0.000032 | 0.000001 | 0.282022 | 0.000032 | 0.282021 | -26.5 | -5.1  | 1.2 | 1688 | 2141 | 72  | -1.00 |
| U-1_14     | 971 | 0.001941 | 0.000051 | 0.000001 | 0.281993 | 0.000075 | 0.281992 | -27.5 | -6.1  | 2.7 | 1727 | 2205 | 166 | -1.00 |
| U-1_15     | 971 | 0.001255 | 0.000035 | 0.000001 | 0.281970 | 0.000034 | 0.281970 | -28.4 | -6.9  | 1.2 | 1758 | 2255 | 76  | -1.00 |
| U-1_16     | 971 | 0.001622 | 0.000045 | 0.000001 | 0.281931 | 0.000037 | 0.281930 | -29.7 | -8.3  | 1.3 | 1811 | 2342 | 81  | -1.00 |
| U-1_17     | 971 | 0.001229 | 0.000034 | 0.000000 | 0.281884 | 0.000029 | 0.281883 | -31.4 | -10.0 | 1.1 | 1874 | 2445 | 65  | -1.00 |
| U-1_18     | 971 | 0.001286 | 0.000035 | 0.000000 | 0.281795 | 0.000031 | 0.281794 | -34.5 | -13.1 | 1.1 | 1994 | 2640 | 69  | -1.00 |
| U-1_19     | 971 | 0.002052 | 0.000059 | 0.000001 | 0.282020 | 0.000060 | 0.282019 | -26.6 | -5.1  | 2.2 | 1691 | 2145 | 134 | -1.00 |
| U-1_20     | 971 | 0.001279 | 0.000035 | 0.000001 | 0.281914 | 0.000047 | 0.281913 | -30.4 | -8.9  | 1.7 | 1834 | 2380 | 104 | -1.00 |
| U-1_21     | 971 | 0.001102 | 0.000031 | 0.000001 | 0.281865 | 0.000031 | 0.281864 | -32.1 | -10.7 | 1.1 | 1900 | 2487 | 68  | -1.00 |
| U-1_22     | 971 | 0.001198 | 0.000033 | 0.000001 | 0.281910 | 0.000032 | 0.281909 | -30.5 | -9.1  | 1.1 | 1839 | 2388 | 70  | -1.00 |
| U-1_23     | 971 | 0.001283 | 0.000036 | 0.000001 | 0.281926 | 0.000038 | 0.281925 | -29.9 | -8.5  | 1.4 | 1817 | 2353 | 85  | -1.00 |
| U-1_24     | 971 | 0.001144 | 0.000031 | 0.000000 | 0.281884 | 0.000031 | 0.281883 | -31.4 | -10.0 | 1.1 | 1874 | 2445 | 70  | -1.00 |
| U-1_25     | 971 | 0.001166 | 0.000031 | 0.000001 | 0.281738 | 0.000034 | 0.281738 | -36.6 | -15.1 | 1.2 | 2070 | 2765 | 74  | -1.00 |
| U-1_26     | 971 | 0.001481 | 0.000040 | 0.000001 | 0.281810 | 0.000039 | 0.281810 | -34.0 | -12.6 | 1.4 | 1973 | 2607 | 86  | -1.00 |
| U-1_27     | 971 | 0.001180 | 0.000032 | 0.000001 | 0.281834 | 0.000031 | 0.281833 | -33.2 | -11.7 | 1.1 | 1941 | 2555 | 68  | -1.00 |
| U-1_28     | 971 | 0.001257 | 0.000033 | 0.000001 | 0.281882 | 0.000034 | 0.281882 | -31.5 | -10.0 | 1.2 | 1876 | 2448 | 76  | -1.00 |
| U-1_29     | 971 | 0.001249 | 0.000035 | 0.000001 | 0.281957 | 0.000037 | 0.281957 | -28.8 | -7.4  | 1.3 | 1775 | 2283 | 83  | -1.00 |
| <b>U-3</b> |     |          |          |          |          |          |          |       |       |     |      |      |     |       |
| U-3_01     | 966 | 0.000024 | 0.000002 | 0.000000 | 0.281780 | 0.000018 | 0.281780 | -35.1 | -13.7 | 0.7 | 2012 | 2675 | 40  | -1.00 |

|        |     |          |          |          |          |          |          |       |       |     |      |      |    |       |
|--------|-----|----------|----------|----------|----------|----------|----------|-------|-------|-----|------|------|----|-------|
| U-3_02 | 966 | 0.000024 | 0.000002 | 0.000000 | 0.281797 | 0.000015 | 0.281796 | -34.5 | -13.2 | 0.6 | 1990 | 2639 | 34 | -1.00 |
| U-3_03 | 966 | 0.000018 | 0.000002 | 0.000000 | 0.281782 | 0.000015 | 0.281782 | -35.0 | -13.7 | 0.6 | 2009 | 2670 | 34 | -1.00 |
| U-3_04 | 966 | 0.000019 | 0.000002 | 0.000000 | 0.281750 | 0.000015 | 0.281750 | -36.1 | -14.8 | 0.6 | 2052 | 2740 | 34 | -1.00 |
| U-3_05 | 966 | 0.000018 | 0.000002 | 0.000000 | 0.281767 | 0.000014 | 0.281767 | -35.5 | -14.2 | 0.6 | 2029 | 2703 | 32 | -1.00 |
| U-3_06 | 966 | 0.000063 | 0.000004 | 0.000000 | 0.281746 | 0.000014 | 0.281746 | -36.3 | -14.9 | 0.6 | 2058 | 2749 | 32 | -1.00 |
| U-3_07 | 966 | 0.000520 | 0.000025 | 0.000001 | 0.281758 | 0.000016 | 0.281758 | -35.8 | -14.5 | 0.6 | 2042 | 2723 | 35 | -1.00 |
| U-3_08 | 966 | 0.000090 | 0.000004 | 0.000000 | 0.281722 | 0.000016 | 0.281722 | -37.1 | -15.8 | 0.6 | 2090 | 2802 | 37 | -1.00 |
| U-3_09 | 966 | 0.000067 | 0.000003 | 0.000000 | 0.281732 | 0.000016 | 0.281732 | -36.8 | -15.5 | 0.6 | 2077 | 2781 | 36 | -1.00 |
| U-3_10 | 966 | 0.000015 | 0.000002 | 0.000000 | 0.281755 | 0.000015 | 0.281755 | -36.0 | -14.6 | 0.6 | 2045 | 2729 | 35 | -1.00 |
| U-3_11 | 966 | 0.000018 | 0.000002 | 0.000000 | 0.281757 | 0.000016 | 0.281757 | -35.9 | -14.6 | 0.6 | 2043 | 2726 | 35 | -1.00 |
| U-3_12 | 966 | 0.000020 | 0.000002 | 0.000000 | 0.281748 | 0.000016 | 0.281748 | -36.2 | -14.9 | 0.6 | 2056 | 2746 | 35 | -1.00 |
| U-3_13 | 966 | 0.000090 | 0.000004 | 0.000000 | 0.281744 | 0.000016 | 0.281744 | -36.3 | -15.0 | 0.6 | 2060 | 2754 | 37 | -1.00 |
| U-3_14 | 966 | 0.000021 | 0.000002 | 0.000000 | 0.281732 | 0.000015 | 0.281732 | -36.8 | -15.4 | 0.6 | 2077 | 2781 | 35 | -1.00 |
| U-3_15 | 966 | 0.000067 | 0.000004 | 0.000000 | 0.281731 | 0.000016 | 0.281731 | -36.8 | -15.5 | 0.6 | 2078 | 2782 | 36 | -1.00 |
| U-3_16 | 966 | 0.000031 | 0.000002 | 0.000000 | 0.281736 | 0.000015 | 0.281736 | -36.6 | -15.3 | 0.6 | 2071 | 2771 | 33 | -1.00 |
| U-3_17 | 966 | 0.000017 | 0.000002 | 0.000000 | 0.281738 | 0.000016 | 0.281738 | -36.6 | -15.2 | 0.6 | 2069 | 2768 | 36 | -1.00 |
| U-3_18 | 966 | 0.000018 | 0.000002 | 0.000000 | 0.281731 | 0.000015 | 0.281731 | -36.8 | -15.5 | 0.6 | 2078 | 2782 | 34 | -1.00 |
| U-3_19 | 966 | 0.000065 | 0.000004 | 0.000000 | 0.281710 | 0.000015 | 0.281710 | -37.5 | -16.2 | 0.6 | 2106 | 2828 | 33 | -1.00 |
| U-3_20 | 966 | 0.000021 | 0.000002 | 0.000000 | 0.281741 | 0.000016 | 0.281741 | -36.5 | -15.1 | 0.6 | 2064 | 2761 | 37 | -1.00 |
| U-3_21 | 966 | 0.003256 | 0.000120 | 0.000006 | 0.281748 | 0.000016 | 0.281745 | -36.2 | -15.0 | 0.6 | 2062 | 2751 | 37 | -1.00 |
| U-3_22 | 966 | 0.000873 | 0.000035 | 0.000003 | 0.281756 | 0.000018 | 0.281755 | -35.9 | -14.6 | 0.7 | 2046 | 2729 | 41 | -1.00 |

**Coltan139**

|              |     |          |          |          |          |          |          |       |       |     |      |      |    |       |
|--------------|-----|----------|----------|----------|----------|----------|----------|-------|-------|-----|------|------|----|-------|
| Coltan139_01 | 505 | 0.133207 | 0.003366 | 0.000001 | 0.282006 | 0.000021 | 0.281974 | -27.1 | -17.1 | 0.7 | 1870 | 2539 | 46 | -0.90 |
| Coltan139_02 | 505 | 0.133003 | 0.003369 | 0.000001 | 0.282020 | 0.000022 | 0.281988 | -26.6 | -16.6 | 0.8 | 1848 | 2508 | 49 | -0.90 |
| Coltan139_03 | 505 | 0.133638 | 0.003377 | 0.000002 | 0.281915 | 0.000022 | 0.281883 | -30.3 | -20.3 | 0.8 | 2004 | 2740 | 49 | -0.90 |
| Coltan139_04 | 505 | 0.134150 | 0.003384 | 0.000001 | 0.281891 | 0.000023 | 0.281859 | -31.2 | -21.2 | 0.8 | 2039 | 2792 | 51 | -0.90 |
| Coltan139_05 | 505 | 0.133993 | 0.003376 | 0.000001 | 0.281942 | 0.000021 | 0.281910 | -29.3 | -19.4 | 0.7 | 1964 | 2679 | 47 | -0.90 |
| Coltan139_06 | 505 | 0.134002 | 0.003383 | 0.000001 | 0.281928 | 0.000024 | 0.281896 | -29.9 | -19.9 | 0.8 | 1985 | 2711 | 52 | -0.90 |

|              |     |          |          |          |          |          |          |       |       |     |      |      |    |       |
|--------------|-----|----------|----------|----------|----------|----------|----------|-------|-------|-----|------|------|----|-------|
| Coltan139_07 | 505 | 0.134628 | 0.003384 | 0.000001 | 0.281962 | 0.000023 | 0.281930 | -28.7 | -18.7 | 0.8 | 1935 | 2636 | 51 | -0.90 |
| Coltan139_08 | 505 | 0.135477 | 0.003403 | 0.000001 | 0.281920 | 0.000020 | 0.281888 | -30.1 | -20.2 | 0.7 | 1998 | 2728 | 44 | -0.90 |
| Coltan139_09 | 505 | 0.138112 | 0.003469 | 0.000001 | 0.282004 | 0.000022 | 0.281971 | -27.1 | -17.2 | 0.8 | 1877 | 2544 | 49 | -0.90 |
| Coltan139_10 | 505 | 0.140027 | 0.003511 | 0.000001 | 0.281921 | 0.000020 | 0.281888 | -30.1 | -20.2 | 0.7 | 2002 | 2728 | 43 | -0.89 |
| Coltan139_11 | 505 | 0.134025 | 0.003395 | 0.000001 | 0.281983 | 0.000023 | 0.281951 | -27.9 | -17.9 | 0.8 | 1904 | 2589 | 50 | -0.90 |
| Coltan139_12 | 505 | 0.134845 | 0.003418 | 0.000001 | 0.281971 | 0.000024 | 0.281939 | -28.3 | -18.3 | 0.8 | 1923 | 2615 | 52 | -0.90 |
| Coltan139_13 | 505 | 0.135701 | 0.003442 | 0.000003 | 0.282043 | 0.000024 | 0.282010 | -25.8 | -15.8 | 0.8 | 1819 | 2459 | 53 | -0.90 |
| Coltan139_14 | 505 | 0.134345 | 0.003409 | 0.000001 | 0.281996 | 0.000023 | 0.281964 | -27.4 | -17.5 | 0.8 | 1886 | 2562 | 51 | -0.90 |
| Coltan139_15 | 505 | 0.135211 | 0.003435 | 0.000001 | 0.282057 | 0.000023 | 0.282025 | -25.3 | -15.3 | 0.8 | 1797 | 2427 | 51 | -0.90 |
| Coltan139_16 | 505 | 0.133534 | 0.003378 | 0.000001 | 0.281889 | 0.000022 | 0.281857 | -31.2 | -21.3 | 0.8 | 2042 | 2796 | 49 | -0.90 |
| Coltan139_17 | 505 | 0.134251 | 0.003397 | 0.000001 | 0.281962 | 0.000023 | 0.281930 | -28.6 | -18.7 | 0.8 | 1935 | 2635 | 50 | -0.90 |
| Coltan139_18 | 505 | 0.135511 | 0.003424 | 0.000001 | 0.281968 | 0.000021 | 0.281936 | -28.4 | -18.5 | 0.7 | 1927 | 2622 | 46 | -0.90 |
| Coltan139_19 | 505 | 0.136330 | 0.003463 | 0.000007 | 0.282008 | 0.000024 | 0.281976 | -27.0 | -17.1 | 0.8 | 1870 | 2535 | 53 | -0.90 |
| Coltan139_20 | 505 | 0.134935 | 0.003419 | 0.000001 | 0.282018 | 0.000023 | 0.281985 | -26.7 | -16.7 | 0.8 | 1855 | 2514 | 50 | -0.90 |

---

**713-79**

|           |     |          |          |          |          |          |          |     |      |     |     |     |    |       |
|-----------|-----|----------|----------|----------|----------|----------|----------|-----|------|-----|-----|-----|----|-------|
| 713-79_01 | 218 | 0.000166 | 0.000012 | 0.000000 | 0.282858 | 0.000019 | 0.282858 | 3.0 | 7.8  | 0.7 | 544 | 751 | 43 | -1.00 |
| 713-79_02 | 218 | 0.000213 | 0.000015 | 0.000001 | 0.282945 | 0.000030 | 0.282945 | 6.1 | 10.9 | 1.1 | 424 | 554 | 69 | -1.00 |
| 713-79_03 | 218 | 0.000294 | 0.000019 | 0.000000 | 0.282871 | 0.000027 | 0.282871 | 3.5 | 8.3  | 1.0 | 527 | 722 | 61 | -1.00 |
| 713-79_04 | 218 | 0.000187 | 0.000013 | 0.000000 | 0.282929 | 0.000033 | 0.282929 | 5.6 | 10.3 | 1.2 | 446 | 590 | 74 | -1.00 |
| 713-79_05 | 218 | 0.000248 | 0.000018 | 0.000000 | 0.282918 | 0.000026 | 0.282918 | 5.2 | 10.0 | 0.9 | 461 | 614 | 59 | -1.00 |
| 713-79_06 | 218 | 0.000402 | 0.000023 | 0.000001 | 0.282977 | 0.000037 | 0.282977 | 7.2 | 12.0 | 1.3 | 380 | 482 | 84 | -1.00 |
| 713-79_07 | 218 | 0.000633 | 0.000027 | 0.000001 | 0.282920 | 0.000031 | 0.282920 | 5.2 | 10.0 | 1.1 | 458 | 610 | 70 | -1.00 |
| 713-79_08 | 218 | 0.000522 | 0.000027 | 0.000003 | 0.282846 | 0.000030 | 0.282846 | 2.6 | 7.4  | 1.1 | 560 | 777 | 67 | -1.00 |
| 713-79_09 | 218 | 0.000358 | 0.000019 | 0.000001 | 0.282892 | 0.000031 | 0.282892 | 4.2 | 9.0  | 1.1 | 497 | 674 | 70 | -1.00 |
| 713-79_10 | 218 | 0.002848 | 0.000105 | 0.000007 | 0.282928 | 0.000034 | 0.282928 | 5.5 | 10.3 | 1.2 | 448 | 593 | 76 | -1.00 |
| 713-79_11 | 218 | 0.000582 | 0.000038 | 0.000001 | 0.282947 | 0.000042 | 0.282947 | 6.2 | 11.0 | 1.5 | 421 | 549 | 96 | -1.00 |
| 713-79_12 | 218 | 0.000208 | 0.000015 | 0.000000 | 0.282880 | 0.000021 | 0.282880 | 3.8 | 8.6  | 0.8 | 513 | 700 | 48 | -1.00 |
| 713-79_13 | 218 | 0.000242 | 0.000015 | 0.000001 | 0.282938 | 0.000027 | 0.282938 | 5.9 | 10.7 | 1.0 | 434 | 570 | 62 | -1.00 |

|           |     |          |          |          |          |          |          |     |      |     |     |     |    |       |
|-----------|-----|----------|----------|----------|----------|----------|----------|-----|------|-----|-----|-----|----|-------|
| 713-79_14 | 218 | 0.000249 | 0.000017 | 0.000000 | 0.282923 | 0.000030 | 0.282922 | 5.3 | 10.1 | 1.1 | 455 | 605 | 69 | -1.00 |
| 713-79_15 | 218 | 0.000232 | 0.000016 | 0.000000 | 0.282907 | 0.000028 | 0.282907 | 4.8 | 9.6  | 1.0 | 477 | 641 | 63 | -1.00 |
| 713-79_16 | 218 | 0.000222 | 0.000016 | 0.000000 | 0.282911 | 0.000029 | 0.282911 | 4.9 | 9.7  | 1.0 | 470 | 630 | 66 | -1.00 |
| 713-79_17 | 218 | 0.000234 | 0.000016 | 0.000000 | 0.282891 | 0.000029 | 0.282890 | 4.2 | 9.0  | 1.0 | 499 | 677 | 65 | -1.00 |
| 713-79_18 | 218 | 0.000246 | 0.000017 | 0.000000 | 0.282901 | 0.000025 | 0.282901 | 4.6 | 9.4  | 0.9 | 484 | 653 | 56 | -1.00 |
| 713-79_19 | 218 | 0.000238 | 0.000017 | 0.000000 | 0.282910 | 0.000026 | 0.282910 | 4.9 | 9.7  | 0.9 | 473 | 634 | 58 | -1.00 |
| 713-79_20 | 218 | 0.000225 | 0.000016 | 0.000000 | 0.282909 | 0.000029 | 0.282909 | 4.8 | 9.6  | 1.0 | 474 | 636 | 66 | -1.00 |
| 713-79_21 | 218 | 0.000201 | 0.000015 | 0.000000 | 0.282869 | 0.000029 | 0.282869 | 3.4 | 8.2  | 1.0 | 529 | 726 | 66 | -1.00 |
| 713-79_22 | 218 | 0.000235 | 0.000017 | 0.000000 | 0.282909 | 0.000024 | 0.282909 | 4.9 | 9.6  | 0.9 | 473 | 635 | 55 | -1.00 |
| 713-79_23 | 218 | 0.000248 | 0.000017 | 0.000000 | 0.282892 | 0.000027 | 0.282892 | 4.3 | 9.0  | 1.0 | 497 | 674 | 61 | -1.00 |
| 713-79_24 | 218 | 0.000194 | 0.000014 | 0.000000 | 0.282920 | 0.000024 | 0.282920 | 5.2 | 10.0 | 0.8 | 458 | 610 | 54 | -1.00 |
| 713-79_25 | 218 | 0.000180 | 0.000013 | 0.000000 | 0.282860 | 0.000031 | 0.282860 | 3.1 | 7.9  | 1.1 | 541 | 746 | 69 | -1.00 |
| 713-79_26 | 218 | 0.000180 | 0.000013 | 0.000000 | 0.282948 | 0.000030 | 0.282948 | 6.2 | 11.0 | 1.0 | 419 | 546 | 67 | -1.00 |
| 713-79_27 | 218 | 0.000247 | 0.000016 | 0.000000 | 0.282865 | 0.000026 | 0.282865 | 3.3 | 8.1  | 0.9 | 535 | 736 | 60 | -1.00 |
| 713-79_28 | 218 | 0.000239 | 0.000018 | 0.000000 | 0.282889 | 0.000027 | 0.282889 | 4.1 | 8.9  | 1.0 | 502 | 682 | 62 | -1.00 |
| 713-79_29 | 218 | 0.000172 | 0.000012 | 0.000000 | 0.282819 | 0.000019 | 0.282819 | 1.7 | 6.5  | 0.7 | 597 | 838 | 44 | -1.00 |

88  $^{176}\text{Hf}/^{177}\text{Hf}_i = ((^{176}\text{Hf}/^{177}\text{Hf})_S - (^{176}\text{Lu}/^{177}\text{Hf})_S \times (e^{\lambda t} - 1));$

89  $\epsilon_{\text{Hf}(0)} = ((^{176}\text{Hf}/^{177}\text{Hf})_S / (^{176}\text{Hf}/^{177}\text{Hf})_{\text{CHUR},0} - 1) \times 10000;$

90  $\epsilon_{\text{Hf}(t)} = (((^{176}\text{Hf}/^{177}\text{Hf})_S - (^{176}\text{Lu}/^{177}\text{Hf})_S \times (e^{\lambda t} - 1)) / ((^{176}\text{Hf}/^{177}\text{Hf})_{\text{CHUR},0} - (^{176}\text{Lu}/^{177}\text{Hf})_{\text{CHUR}} \times (e^{\lambda t} - 1)) - 1) \times 10000;$

91  $T_{\text{DM}} = 1/\lambda \times \ln(1 + ((^{176}\text{Hf}/^{177}\text{Hf})_S - (^{176}\text{Hf}/^{177}\text{Hf})_{\text{DM}}) / ((^{176}\text{Lu}/^{177}\text{Hf})_S - (^{176}\text{Lu}/^{177}\text{Hf})_{\text{DM}}));$

92  $\text{TC DM} = T_{\text{DM}} - (T_{\text{DM}} - t) \times ((f_{\text{CC}} - f_S) / (f_{\text{CC}} - f_{\text{DM}}));$

93  $f_{\text{Lu}/\text{Hf}} = (^{176}\text{Lu} / ^{177}\text{Hf})_S / (^{176}\text{Lu} / ^{177}\text{Hf})_{\text{CHUR}} - 1.$

94 Where,  $(^{176}\text{Lu}/^{177}\text{Hf})_S$  and  $(^{176}\text{Hf}/^{177}\text{Hf})_S$  are the measured values of the sample,  $(^{176}\text{Hf}/^{177}\text{Hf})_{\text{CHUR},0} = 0.282772$  and  $(^{176}\text{Lu}/^{177}\text{Hf})_{\text{CHUR}} = 0.0332$  (Blichert-Toft and  
95 Albarède, 1997),<sup>11</sup>  $(^{176}\text{Lu}/^{177}\text{Hf})_{\text{DM}} = 0.0384$  and  $(^{176}\text{Hf}/^{177}\text{Hf})_{\text{DM}} = 0.28325$  (Griffin *et al.*, 2000),<sup>12</sup>  $(^{176}\text{Lu}/^{177}\text{Hf})_{\text{C}} = 0.015$  (Griffin *et al.*, 2002),<sup>13</sup>  $t$  = crystallization  
96 times of columbite-tantalite group mineral,  $^{176}\text{Lu}$  decay constant  $\lambda = 1.867 \times 10^{-5} \text{ m.y}^{-1}$  (Söderlund *et al.*, 2004),<sup>14</sup>  $f_{\text{Lu}/\text{Hf}}$  value of the crust = -0.55,  $f_{\text{Lu}/\text{Hf}}$  value of the  
97 depleted mantle = 0.16.

98

## 99 References

- 100 1. X. D. Che, F. Y. Wu, R. C. Wang, A. Gerdes, W. Q. Ji, Z. H. Zhao, J. H. Yang and Z. Y. Zhu,  
101 *Ore Geol. Rev.*, 2015, **65**, 979-989.
- 102 2. Y. Liu, Z. Hu, S. Gao, D. Günther, J. Xu, C. Gao and H. Chen, *Chem. Geol.*, 2008, **257**, 34-43.
- 103 3. D. Weis, B. Kieffer, D. Hanano, I. N. Silva, J. Barling, W. Pretorius, C. Maerschalk and N.  
104 Mattielli, *Geochem., Geophys., Geosyst.*, 2007, **8**, Q06006.
- 105 4. O. Nebel, M. L. A. Morel and P. Z. Vroon, *Geostand. Geoanal. Res.*, 2009, **33**, 487-499.
- 106 5. Y. H. Yang, H. F. Zhang, Z. Y. Chu, L. W. Xie and F. Y. Wu, *Int. J. Mass Spectrom.*, 2010, **290**,  
107 120-126.
- 108 6. H. L. Lei, T. Yang, S. Y. Jiang and W. Pu, *J. Sep. Sci.*, 2019, **42**, 3261-3276.
- 109 7. A. Fourny, D. Weis and J. S. Scoates, *Geochem., Geophys., Geosyst.*, 2016, **17**, 739-773.
- 110 8. J. Blichert-Toft, *Geostand. Newsl.*, 2001, **25**, 41-56.
- 111 9. J. D. Woodhead and J. M. Hergt, *Geostand. Geoanal. Res.*, 2005, **29**, 183-195.
- 112 10. F. Y. Wu, Y. H. Yang, L. W. Xie, J. H. Yang and P. Xu, *Chem. Geol.*, 2006, **234**, 105-126.
- 113 11. J. Blichert-Toft and F. Albarède, *Earth Planet. Sci. Lett.*, 1997, **148**, 243-258.
- 114 12. W. L. Griffin, N. J. Pearson, E. Belousova, S. E. Jackson, E. V. Achterbergh, S. Y. O'Reilly and  
115 S. R. Shee, *Geochim. Cosmochim. Acta*, 2000, **64**, 133-147.
- 116 13. W. L. Griffin, X. Wang, S. E. Jackson, N. J. Pearson, S. Y. O'Reilly, X. S. Xu and X. M. Zhou,  
117 *Lithos*, 2002, **61**, 237-269.
- 118 14. U. Söderlund, P. J. Patchett, J. D. Vervoort and C. E. Isachsen, *Earth Planet. Sci. Lett.*, 2004,  
119 **219**, 311-324.
- 120
